1  
2 **Title: The localization of PHRAGMOPLAST ORIENTING KINESIN1 at the division site depends**  
3 **on two microtubule binding proteins TANGLED1 and AUXIN-INDUCED-IN-ROOT-CULTURES9**  
4 **in Arabidopsis.**

5  
6 **Running title:** Determinants of POK1 localization

7  
8  
9 Alison M. Mills<sup>1</sup>, Victoria H. Morris<sup>2,3</sup>, Carolyn G Rasmussen<sup>1,2,\*</sup>

10  
11 <sup>1</sup>Graduate Group in Biochemistry and Molecular Biology

12 <sup>2</sup>Department of Botany and Plant Sciences, Center for Plant Cell Biology, Institute of Integrative  
13 Genome Biology, University of California, Riverside.

14 <sup>3</sup>Current address: Brandeis University, Waltham, MA

15  
16  
17 \*Correspondence to Carolyn Rasmussen: carolyn.rasmussen@ucr.edu

18  
19 ORCID CGR 0000-0002-4354-6295

20 ORCID AMM 0000-0002-7391-1409

21 ORCID VHM 0000-0003-4881-6343

22  
23 **Keywords:** mitosis, cytokinesis, TANGLED1, AIR9, phragmoplast, POK1, division plane orientation,  
24 Arabidopsis

25  
26 **One sentence summary:** Specific amino acids within TAN1 are required for its correct localization  
27 and function partially through interaction with POK1; both TAN1 and AIR9 mediate POK1 division  
28 site localization.

29

30

31

32 **Abstract:**

33 Proper plant growth and development requires spatial coordination of cell divisions. Two unrelated  
34 microtubule-binding proteins, TANGLED1 (TAN1) and AUXIN-INDUCED-IN-ROOT-CULTURES9  
35 (AIR9), are together required for normal growth and division-plane orientation in Arabidopsis.  
36 *tan1 air9* double mutants have synthetic growth and division-plane orientation defects while single  
37 mutants lack obvious defects. Here we show that the division-site localized protein,  
38 PHRAGMOPLAST-ORIENTING-KINESIN1 (POK1), was aberrantly lost from the division site during  
39 metaphase and telophase in *tan1 air9* mutants. Since TAN1 and POK1 interact via the first 132  
40 amino acids of TAN1 (TAN1<sub>1-132</sub>), we assessed its localization and function in the *tan1 air9* double  
41 mutant. TAN1<sub>1-132</sub> rescued *tan1 air9* mutant phenotypes and localized to the division site in  
42 telophase. However, replacing six amino-acid residues within TAN1<sub>1-132</sub> that disrupts POK1-TAN1  
43 interaction in the yeast-two-hybrid system caused loss of both rescue and division-site localization  
44 of TAN1<sub>1-132</sub> in *tan1 air9* mutants. Full-length TAN1 with the same alanine substitutions had defects  
45 in phragmoplast guidance and reduced TAN1 and POK1 localization at the division site but rescued  
46 most *tan1 air9* mutant phenotypes. Together, these data suggest that TAN1 and AIR9 are required  
47 for POK1 localization, and yet unknown proteins may stabilize TAN1-POK1 interactions.

48  
49

## 50 **Introduction**

51 Division plane orientation is important for many aspects of plant, microbial, and animal  
52 development, particularly growth and patterning. Division plane orientation is especially relevant  
53 for plant cells which are encased in cell walls, and unable to migrate (Rasmussen and Bellinger,  
54 2018; Livanos and Müller, 2019; Facette et al., 2018; Wu et al., 2018). Positioning and construction  
55 of the new cell wall (cell plate) during cytokinesis involves two microtubule- and microfilament-  
56 rich cytoskeletal structures, the preprophase band (PPB) and the phragmoplast respectively  
57 (Smertenko et al., 2017). The PPB is a ring of microtubules, microfilaments, and proteins that forms  
58 at the cell cortex just beneath the plasma membrane during G2: this region is defined as the cortical  
59 division zone (Van Damme, 2009; Smertenko et al., 2017; Li et al., 2015). The cortical division zone  
60 is characterized by active endocytosis mediated by TPLATE-clathrin coated vesicles that may  
61 deplete actin and the actin-binding kinesin like-protein KCA1/KAC1 (Vanstraelen et al., 2004;  
62 Suetsugu et al., 2010; Karahara et al., 2009; Kojo et al., 2013; Panteris, 2008; Hoshino et al., 2003).  
63 After nuclear envelope breakdown, the PPB disassembles and the metaphase spindle, an  
64 antiparallel microtubule array with its plus-ends directed toward the middle of the cell, forms (Dixit  
65 and Cyr, 2002). After the chromosomes are separated, the phragmoplast is constructed from  
66 spindle remnants to form another antiparallel array of microtubules (Lee and Liu, 2019). The  
67 phragmoplast microtubules are tracks for the movement of vesicles containing cell wall materials  
68 towards the forming cell plate (McMichael and Bednarek, 2013; Müller and Jürgens, 2016). The  
69 phragmoplast expands by nucleation of new microtubules on pre-existing microtubules (Murata et  
70 al., 2013; Smertenko et al., 2018) and is partially dependent on the mitotic microtubule binding  
71 protein ENDOSPERM DEFECTIVE1 and the augmin complex to recruit gamma tubulin to  
72 phragmoplast microtubules (Lee et al., 2017; Nakaoka et al., 2012). Finally, the phragmoplast  
73 reaches the cell cortex and the cell plate and associated membranes fuse with the mother cell  
74 membranes at the cell plate fusion site previously specified by the PPB (van Oostende-Triplet et al.,  
75 2017).

76  
77 TANGLED1 (TAN1, AT3G05330) was the first protein identified to localize to the plant division site  
78 throughout mitosis and cytokinesis (Walker et al., 2007). In maize, the *tan1* mutant has defects in  
79 division plane orientation caused by phragmoplast guidance defects (Cleary and Smith, 1998;  
80 Martinez et al., 2017). TAN1 bundles and crosslinks microtubules in vitro (Martinez et al., 2020). In  
81 vivo, TAN1 promotes microtubule pausing at the division site (Bellinger et al., 2021). TAN1,  
82 together with other division site localized proteins, is critical for the organization of an array of cell  
83 cortex localized microtubules that is independent from the phragmoplast. These cortical-telophase  
84 microtubules accumulate at the cell cortex during telophase and are subsequently incorporated  
85 into the phragmoplast to direct its movement towards the division site (Bellinger et al., 2021).  
86 Other important division site localized proteins were identified through their interaction with  
87 TAN1, such as the division site localized kinesin-12 proteins PHRAGMOPLAST ORIENTING  
88 KINESIN1 (POK1) and POK2 (Müller et al., 2006; Lipka et al., 2014). Similar to other kinesin-12  
89 proteins, PHRAGMOPLAST ASSOCIATED KINESIN RELATED PROTEIN (PAKRP1) and PAKRPL1  
90 (Lee et al., 2007; Pan et al., 2004), POK2 localizes to the phragmoplast midline during telophase and

91 plays a unique role in phragmoplast expansion (Herrmann et al., 2018). Together, POK1 and POK2  
92 are required to guide the phragmoplast to the division site (Herrmann et al., 2018; Müller et al.,  
93 2006). *pok1 pok2 Arabidopsis thaliana* (Arabidopsis) double mutants have stunted growth and  
94 misplaced cell walls as a result of phragmoplast guidance defects (Müller et al., 2006). The *pok1*  
95 *pok2* double mutants also fail to maintain TAN1 at the division site after entry into metaphase  
96 (Lipka et al., 2014). This suggests that TAN1 maintenance at the division site after metaphase is  
97 dependent on POK1 and POK2.

98  
99 In Arabidopsis, *tan1* mutants have very minor phenotypes (Walker et al., 2007). However,  
100 combination of *tan1* with *auxin-induced-in-root-cultures9 (air9)*, a mutant with no obvious defects  
101 (Buschmann et al., 2015), resulted in a synthetic phenotype consisting of reduced root growth,  
102 increased root cell file rotation and phragmoplast guidance defects (Mir et al., 2018). TAN1 and  
103 AIR9 are unrelated microtubule-binding proteins that both localize to the division site (Walker et  
104 al., 2007; Buschmann et al., 2006). Both TAN1 and AIR9 colocalize with the PPB. TAN1 remains at  
105 the division site throughout cell division, while AIR9 is lost from the division site upon PPB  
106 disassembly and then reappears at the division site during cytokinesis when the phragmoplast  
107 contacts the cortex. When full length *TAN1* fused to *YELLOW FLUORESCENT PROTEIN (TAN1-YFP)*  
108 and driven either by the constitutive viral cauliflower mosaic *CaMV35S* promoter (*p35S:TAN1-YFP*)  
109 or the native promoter with the fluorescent protein as either N- or C-terminal fusion (*pTAN1:TAN1-*  
110 *YFP* or *pTAN1:CFP-TAN1*) was transformed into the *tan1 air9* double mutant, the phenotype was  
111 rescued such that plants looked similar to and grew as well as wild-type plants (Mir et al., 2018;  
112 Mills and Rasmussen, 2022).

113  
114 TAN1 is an intrinsically disordered protein with no well-defined domains. It was divided into five  
115 conserved regions based on alignments of amino acid similarity across plant species. Region I,  
116 which covers the first ~130 amino acids of TAN1, is the most highly conserved, and mediates TAN1  
117 localization to the division site during telophase. This ~130 amino acid region also mediates  
118 interactions between TAN1 and POK1 in the yeast-two-hybrid system (Rasmussen et al., 2011).  
119 When *TAN1* missing the first ~130 amino acids was transformed into the *tan1 air9* double mutant,  
120 no rescue was observed (Mir et al., 2018). This suggests that the first ~130 amino acids of the TAN1  
121 protein are critical for function in root growth and division plane positioning.

122  
123 Here, we show that both AIR9 and TAN1 are required for POK1 to remain at the division site after  
124 PPB disassembly. We identified TAN1-POK1 interaction motifs within the first 132 amino acids  
125 using the yeast-two-hybrid system. Interestingly, the first 132 amino acids of TAN1 (TAN1<sub>1-132</sub>) are  
126 sufficient to rescue the *tan1 air9* double mutant, but not when a TAN1-POK1 interaction motif was  
127 disrupted. We found that when full-length TAN1 with the same mutated motif was used, substantial  
128 rescue was observed, except defects in phragmoplast guidance and loss of POK1 and TAN1 at the  
129 division site during metaphase and telophase. Together, this suggests that interactions between  
130 POK1 and AIR9, and TAN1 and POK1, as well as other yet unknown proteins, are important for  
131 division plane orientation and plant growth.

132  
133

134 **Results:**

135

136 **Either TAN1 or AIR9 is sufficient to recruit and maintain POK1 at the division site**

137 To understand how known division-site localized proteins interact at the division site, we examined  
138 POK1 fused to YELLOW FLUORESCENT PROTEIN (YFP-POK1 (Lipka et al., 2014)) localization in  
139 wild type, *tan1 air9* double mutants and single mutants expressing the microtubule marker  
140 *UBQ10:mScarlet-MAP4* (Pan et al., 2020). Our hypothesis was that POK1 localization would not be  
141 contingent on TAN1 or AIR9, and would therefore be unaltered in the *tan1 air9* double mutant. In  
142 contrast to our hypothesis, YFP-POK1 was lost from the division site during metaphase and  
143 telophase and also accumulated less frequently during preprophase and prophase. In wild-type  
144 cells, YFP-POK1 colocalized with PPBs in 71% of preprophase/prophase cells (n = 50/70 cells, 15  
145 plants, Figure 1A) consistent with previous observations (Schaefer et al., 2017). In the *tan1 air9*  
146 double mutant, YFP-POK1 colocalized with 50% of PPBs during preprophase/prophase, which was  
147 not significantly different than wild-type (n = 27/54 cells, 15 plants, Figure 1D; Table 1; Fisher's  
148 exact test, P-Value = 0.0165, ns with Bonferroni correction). In wild-type cells, YFP-POK1 remained  
149 at the division site in all observed metaphase (n = 13/13 cells, Figure 1B) and telophase cells (n =  
150 31/31 cells, Figure 1C), similar to previous studies (Lipka et al., 2014). In rare instances, YFP-POK1  
151 also accumulated in the phragmoplast midline in wild-type cells (13%, n = 4/31, 11 plants, Table 1).  
152 In contrast, in *tan1 air9* mutants, YFP-POK1 was lost from the division site in metaphase (n = 0/21  
153 cells, Figure 1E; Table 1) and telophase (n = 0/44, Figure 1F). Interestingly, in *tan1 air9* double  
154 mutants, although YFP-POK1 did not accumulate at the division site, it accumulated at the  
155 phragmoplast midline in 77% of cells (n = 34/44), significantly more frequent midline  
156 accumulation than the 13% observed in wild-type plants (n = 4/31 cells, Table 1; Fisher's exact  
157 test, P-value < 0.00001). Together, this shows that POK1 is not maintained at the division site after  
158 PPB disassembly and that instead it accumulates in the phragmoplast midline. We hypothesize that  
159 mislocalized phragmoplast midline accumulation of YFP-POK1 in *tan1 air9* mutants occurs because  
160 YFP-POK1 is not maintained at the division site.

161

162 Next, we examined YFP-POK1 localization in *tan1* and *air9* single mutants. YFP-POK1 localized to  
163 the division site during all mitotic stages, but aberrantly accumulated in the phragmoplast midline  
164 in *tan1* single mutants. Similar to wild-type plants, YFP-POK1 colocalized with PPBs during  
165 preprophase or prophase in *tan1* mutants (Figure 1G) and *air9* mutants (Figure 1H), and remained  
166 at the division site during metaphase and telophase (Figure 1G-L, Table 1). In *tan1* single mutants,  
167 YFP-POK1 localized both to the division site and the phragmoplast midline in 44% of telophase  
168 cells (Figure 1I, n = 12/27), which is significantly more midline accumulation compared to wild-  
169 type plants (13%, n = 4/31, 10 plants, Fisher's exact test, P-value = 0.0094) or *air9* single mutants  
170 (Figure 1L, 10%, n = 4/40). Aberrant phragmoplast midline accumulation of YFP-POK1 in the *tan1*  
171 single mutants suggested that POK1-TAN1 interaction might be required to maintain POK1 at the  
172 division site. This prompted us to examine their interaction more closely.

173

174 **Amino acids 1-132 of TAN1 Rescue the *tan1 air9* Double Mutant**

175 POK1 interacts with both full-length TAN1 and the first 132 amino acids of TAN1 using the yeast-  
176 two-hybrid system (Rasmussen et al., 2011). In addition, TAN1 missing the first 126 amino acids

177 failed to rescue the *tan1 air9* double mutant, suggesting that this part of the protein is critical for  
178 TAN1 function (Mir et al., 2018). To test the function of this region of the protein in Arabidopsis, the  
179 *TAN1* coding sequence for the first 132 amino acids was fused to YFP (*TAN1<sub>1-132</sub>-YFP*) driven by the  
180 cauliflower mosaic *p35S* promoter and was then transformed into the *tan1 air9* double mutant. We  
181 used *p35S:TAN1-YFP* in the *tan1 air9* double mutant as our benchmark for rescue, as its ability to  
182 rescue the *tan1 air9* double mutant was demonstrated previously (Mir et al., 2018). The progeny of  
183 several independent *p35S:TAN1<sub>1-132</sub>-YFP* lines rescued the *tan1 air9* double mutant, as described in  
184 more detail below. Overall root patterning of *tan1 air9* double mutants expressing either  
185 *p35S:TAN1<sub>1-132</sub>-YFP* or full-length *p35S:TAN1-YFP* was restored, while untransformed *tan1 air9*  
186 double mutant roots had misoriented divisions (Figure 2A, Supplementary Figure 1). Cell file  
187 rotation, which skews left and has large variance in the *tan1 air9* double mutant (Figure 2B & 2C),  
188 was significantly rescued in both *p35S:TAN1<sub>1-132</sub>-YFP* and *p35S:TAN1-YFP tan1 air9* lines ( $n = 37$  and  
189  $41$  plants respectively), compared to the untransformed *tan1 air9* control (Levene's test used due  
190 to non-normal distribution,  $P$ -value  $< 0.0001$ ). Root length at 8 days after stratification was also  
191 restored (Figure 2D). Interestingly, although *TAN1<sub>1-132</sub>-YFP* rarely co-localizes with PPBs in wild-  
192 type plants (Rasmussen et al., 2011) or in *tan1 air9* double mutants (10%,  $n = 9/89$  cells, Figure  
193 3A), PPB angles of *p35S:TAN1<sub>1-132</sub>-YFP* and *p35S:TAN1-YFP tan1 air9* plants had significantly less  
194 variance compared to the untransformed control (Figure 2E). Phragmoplast positioning defects of  
195 the *tan1 air9* double mutant were also significantly rescued by *p35S:TAN1<sub>1-132</sub>-YFP*. Altogether,  
196 *p35S:TAN1<sub>1-132</sub>-YFP* rescued the phenotypes of the double mutant similar to full-length *p35S:TAN1-*  
197 *YFP*. This indicates that most functions that affect phenotypes assessed here are encoded by the  
198 first section of the *TAN1* gene.

199  
200

### 201 **Disrupting TAN1-POK1 interaction alters TAN1 and POK1 localization to the division site** 202 **and reduces *tan1 air9* rescue**

203 To further understand how TAN1 functions, we disrupted its ability to interact with the kinesin  
204 POK1 using alanine scanning mutagenesis. Alanine scanning mutagenesis was used to replace six  
205 amino acids with six alanines across the first  $\sim 120$  amino acids of *TAN1<sub>1-132</sub>* (described in materials  
206 and methods). After testing their interaction with POK1 using the yeast-two-hybrid system, we  
207 identified seven constructs that lost interaction with POK1 (Supplementary Figure 2). Reasoning  
208 that highly conserved amino acids would be more likely to play critical roles in TAN1-POK1  
209 interaction, we selected *TAN1<sub>1-132</sub>* with alanine substitutions replacing the highly conserved amino  
210 acids 28-33 (INKVDK) with six alanines (*TAN1(28-33A)<sub>1-132</sub>*) for analysis in Arabidopsis. Our  
211 hypothesis was that the mutated form of *TAN1<sub>1-132</sub>* (*TAN1(28-33A)<sub>1-132</sub>*) would not rescue the *tan1*  
212 *air9* mutant due to lack of POK1 and TAN1 interaction. *TAN1(28-33A)<sub>1-132</sub>* was cloned into a plant  
213 transformation vector to generate *p35S:TAN1(28-33A)<sub>1-132</sub>-YFP* and transformed into the *tan1 air9*  
214 double mutant. The *p35S:TAN1(28-33A)<sub>1-132</sub>-YFP* construct partially rescued the *tan1 air9* double  
215 mutant (Figure 4). *p35S:TAN1(28-33A)<sub>1-132</sub>-YFP* in the *tan1 air9* double mutant did not rescue cell  
216 file rotation defects (Figure 4B, D) or phragmoplast angle defects (Figure 4F). However, overall  
217 plant growth (Figure 4C) and root length (Figure 4E) showed intermediate rescue compared to  
218 unaltered *p35S:TAN1<sub>1-132</sub>-YFP* in the *tan1 air9* double mutant. PPB angles in *tan1 air9* double  
219 mutants expressing either *p35S:TAN1(28-33A)<sub>1-132</sub>-YFP* or *p35S:TAN1<sub>1-132</sub>-YFP* were similar,

220 suggesting that TAN1-POK1 interaction may not be required for PPB placement (Figure 4F). These  
221 results suggest that the first 132 amino acids of TAN1 perform several vital functions, some of  
222 which are contingent or partially contingent on a likely interaction with POK1 in Arabidopsis.

223  
224 To understand how this mutation within TAN1<sub>1-132</sub> affected localization, we analyzed TAN1(28-  
225 33A)<sub>1-132</sub>-YFP in the *tan1 air9* double mutant. Localization of TAN1(28-33A)<sub>1-132</sub>-YFP to the division  
226 site in *tan1 air9* double mutants was significantly reduced compared to unaltered TAN1<sub>1-132</sub>-YFP,  
227 which localized to the division site during telophase 100% of the time (n = 58/58 cells, 29 plants,  
228 Figures 3E, (Rasmussen et al., 2011)). TAN1(28-33A)<sub>1-132</sub>-YFP showed no obvious division site  
229 localization 68% of the time (n = 15/22 cells, Figure 3I) or faint division site accumulation in 32%  
230 of telophase cells (n = 7/22 cells, Figure 3J). When the fluorescence intensity of TAN1(28-33A)<sub>1-132</sub>-  
231 YFP at the division site during telophase was compared to the cytosolic fluorescence intensity in the  
232 same cell, the median ratio was ~1.1 indicating little preferential accumulation of TAN1(28-33A)<sub>1-132</sub>-  
233 YFP at the division site (Figure 3K). In contrast, the median ratio of unaltered TAN1<sub>1-132</sub>-YFP at  
234 the division site was ~1.8 compared to cytosolic fluorescence, indicating its preferential  
235 accumulation at the division site. This suggests that TAN1 requires the motif in amino acids 28-33  
236 to localize properly to the division site during telophase. Our hypothesis is that this reduced  
237 localization is due to disruptions in TAN1<sub>1-132</sub>-POK1 interaction.

238  
239 Next, we generated a construct that introduced alanines at amino acids 28-33 in full-length YFP-  
240 TAN1 constructs (*p35S:YFP-TAN1(28-33A)*) to assess whether *p35S:YFP-TAN1(28-33A)* would  
241 rescue the *tan1 air9* double mutant. In contrast to the modest partial rescue provided by  
242 *p35S:TAN1(28-33A)<sub>1-132</sub>-YFP*, full-length *p35S:YFP-TAN1(28-33A)* significantly rescued the defects in  
243 the *tan1 air9* double mutant, as described below. First, we assessed whether full-length TAN1(28-  
244 33A) interacted with POK1 via the yeast-two-hybrid system, and it did not (Supplementary Figure  
245 3). Next, we analyzed rescue in Arabidopsis expressing *p35S:YFP-TAN1(28-33A)*. Most defects  
246 except phragmoplast angle variance (Figure 5, Supplementary Figure 4) were fully rescued in the  
247 *p35S:YFP-TAN1(28-33A) tan1 air9* lines, including cell file rotation (Figure 5C), root length (Figure  
248 5D) and PPB angles (Figure 5E). Similar to TAN1-YFP, YFP-TAN1(28-33A) localized to the division  
249 site in preprophase, prophase and telophase (Supplementary Figure 5).

250  
251 To determine if full-length YFP-TAN1(28-33A) had reduced accumulation at the division site during  
252 telophase similar to TAN1(28-33A)<sub>1-132</sub>-YFP, fluorescence intensity levels were measured. During  
253 prophase, YFP-TAN1(28-33A) fluorescence intensity at the division site compared to the cytosol  
254 was comparable to TAN1-YFP fluorescence intensity ratios. In contrast, YFP-TAN1(28-33A)  
255 fluorescence intensity ratios during telophase were reduced to ~1.6 compared with unaltered  
256 TAN1-YFP (~2.1) indicating that YFP-TAN1(28-33A) accumulated less at the division site during  
257 telophase (Supplementary Figure 5). Together, these data suggest that TAN1 is recruited to the  
258 division site during prophase without interaction with POK1. Defects in phragmoplast positioning  
259 may be due specifically to the disruption of TAN1-POK1 interaction, or due to the lower  
260 accumulation of TAN1 at the division site that would normally be mediated by POK1 during  
261 telophase.

262

263 To better understand how these alanine substitutions affect both POK1 and TAN1 localization we  
264 examined *tan1 air9* double mutants expressing a microtubule marker (*UBQ10:mScarlet-MAP4* (Pan  
265 et al., 2020)), *pTAN1:CFP-TAN1(28-33A)* and *pPOK1:YFP-POK1* (Lipka et al., 2014). Both CFP-  
266 TAN1(28-33A) and YFP-POK1 had reduced accumulation at the division site in the *tan1 air9* double  
267 mutant. CFP-TAN1(28-33A) and YFP-POK1 colocalized with the PPB in 41% of cells (n = 32/79)  
268 which is significantly less frequent when compared to 72% of cells (n=58/82 cells, 20 plants) with  
269 PPBs in *tan1 air9* mutants containing unaltered CFP-TAN1 and YFP-POK1 (Figure 6A, Table 2;  
270 Fisher's exact test, P-value = 0.0001). Unaltered CFP-TAN1 fully rescued the *tan1 air9* double  
271 mutant (Mills and Rasmussen, 2022), and serves here as a control. Unaltered CFP-TAN1 and YFP-  
272 POK1 localized and were maintained at the division site similar to wild type in metaphase (Figure  
273 6B, n=13/13), while CFP-TAN1(28-33A) and YFP-POK1 in *tan1 air9* mutants were sometimes  
274 absent from the division site in metaphase with only 58% of metaphase cells maintaining both  
275 proteins at the division site (n = 11/19 cells, Figure 6F, Table 2). During early telophase, unaltered  
276 CFP-TAN1 and YFP-POK1 were always at the division site (n = 14/14, Figure 6C), but CFP-  
277 TAN1(28-33A) and YFP-POK1 were maintained at the division site in only 65% of early telophase  
278 cells (n = 20/31 cells, Figure 6G, Table 2). Interestingly, YFP-POK1 accumulated in the  
279 phragmoplast midline in 26% of early telophase cells (n = 8/31 cells, Table 2) but was not observed  
280 in the phragmoplast midline in early telophase cells of plants expressing unaltered CFP-TAN1 (n =  
281 0/14 cells, Table 2). During late telophase, when the phragmoplast has contacted the cell cortex in  
282 at least one location, CFP-TAN1 and POK1 always localized to the division site (100%, n =63/63  
283 cells, Figure 6D). Interestingly, although not observed in earlier stages, YFP-POK1 and CFP-  
284 TAN1(28-33A) recruitment to the division site increased to 90% of late telophase cells (n = 53/59  
285 cells, Figure 6H). In the remainder of cells, neither CFP-TAN1(28-33) nor YFP-POK1 localized to the  
286 division site (3%, n = 2/59), or only CFP-TAN1(28-33) accumulated at the division site (7%, n =  
287 4/59 cells). Together, these data suggest that TAN1-POK1 interactions play a critical role in  
288 stabilizing them together at the division site. Additionally, it suggests that other, yet unidentified  
289 proteins may recruit both TAN1 and POK1 to the division site, particularly during late telophase, in  
290 the absence of both AIR9 and TAN1-POK1 interaction.  
291  
292



## 293 Discussion

294  
295 In *tan1* and *air9* single mutants, POK1 localizes to the division site and there are no discernable  
296 division plane defects (Model in Supplementary Figure 6). However, in the *tan1 air9* double mutant,  
297 POK1 co-localizes with the PPB but is lost from the division site during metaphase (Model in Figure  
298 7). First, this suggests that TAN1 and AIR9 are not essential for POK1 co-localization with the PPB.  
299 Second, it suggests that POK1 is maintained at the division site after PPB disassembly via direct or  
300 indirect interactions with TAN1 or AIR9. We provide evidence that TAN1 interacts with POK1  
301 through motifs within the first 132 amino acids of TAN1, as identified using the yeast-two-hybrid  
302 system. Alignments of TANGLED1 proteins from representative monocots and dicots, such as  
303 *Solanum lycopersium*, *Oryza sativa*, *Sorghum bicolor*, *Zea mays*, and *Brassica napus*, showed that  
304 amino acids 28-33 (INKVDK) are highly conserved across plant species (Supplementary Figure 7).  
305 Amino acids 30-32 (VDK) are identical and the remaining residues within the motif have similar  
306 properties across these plant species. The high degree of conservation suggests that these amino  
307 acids are likely important for TAN1 function. When alanine substitutions of these amino acids were  
308 introduced into TAN1 and transformed into Arabidopsis *tan1 air9* double mutants, we observed  
309 reduced TAN1 and POK1 localization at the division site, as well as defects in phragmoplast  
310 positioning. Here we hypothesize that amino acids 28-33 are essential for TAN1 and POK1  
311 interaction in both yeast-two-hybrid and in Arabidopsis. In addition to several reports showing that  
312 TAN1 and POK1 interact using the yeast-two-hybrid system (Müller et al., 2006; Rasmussen et al.,  
313 2011), bimolecular fluorescence complementation has also been used to show TAN1-POK1  
314 interactions in Arabidopsis protoplasts (Lipka et al., 2014). Alanine substitutions at positions 28-33  
315 of TAN1 may disrupt TAN1-POK1 interaction through misfolding that blocks the POK1 interaction  
316 site or by affecting the amino acids that directly mediate POK1 binding. Regardless of the exact  
317 mechanism(s) of POK1-TAN1 physical interactions or the possibility that yeast-two-hybrid  
318 interactions do not reflect equivalent POK1-TAN1 physical interactions in Arabidopsis, we show  
319 that these TAN1 amino acids are involved in mediating TAN1 and POK1 localization to the division  
320 site.

321  
322 We demonstrate that the first region of the TAN1 protein, the first 132 amino acids which primarily  
323 accumulates at the division site during telophase (Rasmussen et al., 2011), is both necessary (Mir et  
324 al., 2018) and sufficient to largely rescue the *tan1 air9* double mutant (Figure 2). This suggests that  
325 TAN1<sub>1-132</sub> and its recruitment to the division site during telophase is critical for correct division  
326 plane orientation in the *tan1 air9* double mutant. Although full length TAN1 localizes to the  
327 division site throughout cell division, the ability of TAN1<sub>1-132</sub> to rescue the *tan1 air9* double mutant,  
328 suggests that TAN1, and possibly POK1, localization to the PPB and division site during metaphase  
329 may not be required for division site maintenance in Arabidopsis. Indeed, whether the PPB itself is  
330 required for division plane positioning has been raised by analysis of a triple mutant in three  
331 closely related *TONNEAU RECRUITING MOTIF6,7,8* genes (*trm6,7,8*). *trm678* mutants, which lacked  
332 well defined PPBs, had disrupted POK1 recruitment to the division site but only minor defects in  
333 division positioning (Schaefer et al., 2017). However, when amino acids critical for TAN1-POK1  
334 interactions in the yeast-two-hybrid system are disrupted by transforming *TAN1(28-33A)<sub>1-132</sub>-YFP*  
335 into the *tan1 air9* double mutant, root growth and phragmoplast positioning are disrupted.

336 *TAN1(28-33A)<sub>1-132</sub>-YFP* accumulation at the division site during telophase was reduced compared to  
337 unaltered *TAN1<sub>1-132</sub>-YFP*. This suggests that TAN1-POK1 interaction promotes, but is not strictly  
338 necessary, for TAN1 recruitment to the division site during telophase.

339  
340 Full-length *TAN1(28-33A)* localizes to the division site throughout cell division and almost fully  
341 rescues the *tan1 air9* double mutant. TAN1, AIR9, and POK1 colocalize at the PPB independently of  
342 one another, which may promote the formation of protein complexes required for division site  
343 maintenance. Colocalizing with the PPB may provide an opportunity for proteins in close proximity  
344 to form stabilizing interactions before PPB disassembly. This suggests that recruitment of TAN1  
345 and POK1 to the division site early in cell division may provide another temporally distinct way to  
346 promote correct division plane positioning. Phragmoplast positioning defects in *TAN1(28-33A)*  
347 *tan1 air9* plants may be the result of defects in phragmoplast guidance in cells that lacked  
348 *TAN1(28-33A)* and POK1 at the division site in metaphase or early telophase that were not  
349 corrected in late telophase.

350  
351 The ability of *TAN1(28-33A)* and POK1 to remain at the division site in some cells after PPB  
352 disassembly in the *tan1 air9* double mutant suggests that there are other proteins that interact with  
353 TAN1 and/or POK1 that help stabilize them at the division site perhaps via the formation of  
354 multiprotein complexes. The pleckstrin homology GAPS, PHGAP1 and PHGAP2 (Stöckle et al.,  
355 2016), RANGAP1 (Xu et al., 2008), and IQ67 DOMAIN (IQD)<sub>6,7,8</sub> proteins (Kumari et al., 2021) are  
356 division site localized proteins that may stabilize TAN1 and POK1 at the division site via their  
357 interaction with POK1. PHGAP1, PHGAP2, and RANGAP1 are dependent on POK1 and POK2 for  
358 division site recruitment. Like TAN1, RANGAP1 colocalizes with the PPB and remains at the division  
359 site throughout cell division (Xu et al., 2008). PHGAP1 and PHGAP2 are uniformly distributed in the  
360 cytoplasm and on the plasma membrane in interphase cells and accumulate at the division site  
361 during metaphase. These proteins also have their own distinct roles in division site maintenance  
362 (Stöckle et al., 2016). PHGAP2 has a likely role in division site establishment by regulating ROP  
363 activity (Hwang et al., 2008). RANGAP1 regulation of local RAN-GTP levels has potential roles in  
364 microtubule organization and division site identity (Xu et al., 2008). IQD<sub>6</sub>, IQD<sub>7</sub>, and IQD<sub>8</sub> interact  
365 with POK1 and play a role in PPB formation and POK1 recruitment to the division site. *iqd678* triple  
366 mutants have PPB formation defects and fail to recruit POK1 to the division site in cells lacking  
367 PPBs. However, POK1 localization to the division site in *iqd678* mutants recovers during telophase  
368 to wild-type levels (Kumari et al., 2021). We speculate that this IQD<sub>6-8</sub> independent recruitment  
369 may depend on TAN1. Unlike the PHGAPs and RANGAP1, IQD<sub>8</sub> localization to the division site is not  
370 dependent on POK1 and POK2. This suggests that IQD<sub>6-8</sub> proteins work upstream of POK1 to  
371 establish the division site and are important for POK1 recruitment to the division site early in cell  
372 division. Although TAN1-POK1 interaction becomes critical for TAN1 and POK1 maintenance at the  
373 division site in the absence of AIR9, other division site localized proteins may provide additional  
374 stability and help maintain TAN1 and POK1 at the division site.

375  
376 How AIR9 stabilizes POK1 at the division site in the absence of TAN1 is less clear. There is no  
377 information about whether POK1 and AIR9 interact directly with one another. Additionally, AIR9  
378 localization, in contrast to TAN1 localization, is intermittent at the division site. When expressed in

379 tobacco Bright Yellow2 (BY2) cells, AIR9 colocalizes with the PPB but is then lost from the division  
380 site until late telophase when the phragmoplast contacts the cortex (Buschmann et al., 2006). In  
381 Arabidopsis, AIR9 may localize to the division site during metaphase or telophase, but it is difficult  
382 to observe because AIR9 also strongly colocalizes with cortical microtubules which may obscure  
383 AIR9 localization in nearby cells (Buschmann et al., 2015). Rather than directly interacting with  
384 POK1, AIR9 may recruit other proteins to the division site during preprophase that help maintain  
385 POK1 at the division site in the absence of TAN1. One potential candidate is the kinesin-like  
386 calmodulin binding protein, KCBP, which interacts with AIR9 (Buschmann et al., 2015). KCBP is a  
387 minus-end-directed kinesin (Song et al., 1997) that localizes to the division site in Arabidopsis and  
388 moss (Miki et al., 2014; Buschmann et al., 2015). We speculate that other TAN1, AIR9, and POK1  
389 interacting proteins that have not been identified yet may be key for TAN1-POK1 division site  
390 maintenance.

391  
392 POK1 and POK2 have roles in phragmoplast guidance, but POK2 also has a role in phragmoplast  
393 dynamics (Lipka et al., 2014; Herrmann et al., 2018). Although POK1 does not frequently  
394 accumulate in the phragmoplast midline in wild-type cells, POK2 showed striking dual localization  
395 to both the phragmoplast midline and the division site. Localization of POK2 to the phragmoplast  
396 midline required the N-terminal motor domain, while the C-terminal region was localized to the  
397 division site (Herrmann et al., 2018). Our hypothesis is that the “default” location of both POK1 and  
398 POK2 is at microtubule plus-ends at the phragmoplast midline, based on likely or confirmed plus-  
399 end directed motor activity (Chugh et al., 2018). Interactions with division site localized proteins,  
400 such as TAN1 and AIR9, may stabilize or recruit POK1 and POK2 at the division site away from the  
401 phragmoplast midline.

402  
403 We demonstrate that AIR9 and TAN1 function redundantly to maintain POK1 at the division site to  
404 ensure correct cell wall placement. In the absence of AIR9, our data suggests that TAN1-POK1  
405 interaction promotes, but is not required for, the maintenance of both proteins at the division site  
406 and disrupting this interaction partially disrupts their localization to the division site. This also  
407 suggests that other TAN1, POK1, and AIR9 interacting proteins are involved with stabilizing TAN1  
408 and POK1 at the division site.

409  
410

## 411 **Materials and methods**

### 412 Growth conditions, genotyping mutants, and root length measurements

413 Arabidopsis seedlings were grown on ½ strength Murashige and Skoog (MS) media (MP  
414 Biomedicals; Murashige and Skoog, 1962) containing 0.5 g/L MES (Fisher Scientific), pH 5.7, and  
415 0.8% agar (Fisher Scientific). Seeds sown on plates were first stratified in the dark at 4°C for 2 to 5  
416 days then grown vertically in a growth chamber (Percival) with 16/8-h light/dark cycles and  
417 temperature set to 22°C. For root length experiments, *tan1 air9* transgenic T3 lines expressing  
418 *p35S:TAN1-YFP*, *35S:TAN1<sub>1-132</sub>-YFP*, *35S:TAN1(28-33A)<sub>1-132</sub>-YFP*, or *35S:YFP-TAN1(28-33A)* were  
419 grown vertically, the plates were scanned (Epson) and root lengths were measured using FIJI  
420 [Image], <http://fiji.sc/>) after 8 days. Untransformed *tan1 air9* double mutants and *air9* single  
421 mutants were grown alongside the double mutant seeds expressing the TAN1 constructs in equal

422 numbers on the same plates to ensure plants were grown under the same conditions. After plates  
423 were scanned, seedlings were screened by confocal microscopy to identify seedlings expressing  
424 YFP translational fusion transgenes and CFP-TUBULIN, if present in the transgenic lines. At least 3  
425 biological replicates, grown on separate plates on separate days, and at least 28 plants of each  
426 genotype total across all replicates were analyzed for each root growth experiment. Welch's t-test  
427 was used to identify whether there were statistically significant differences between replicates  
428 before pooling the replicates for analysis. Root lengths were then plotted using Prism (GraphPad).  
429 Statistical analysis of root length was performed with Prism (GraphPad) using t-test with Welch's  
430 correction. Welch's t-test (unequal variance t-test) is used to test the hypothesis that two  
431 populations have equal means. Unlike the Student's t-test, Welch's t-test is often used when two  
432 samples have unequal variances or sample sizes. This test was used due to the unequal sample sizes  
433 because the plants examined were often segregating for multiple transgenes and had lower sample  
434 sizes than control plants such as *air9* single mutants and *tan1 air9* double mutants which either  
435 lacked transgenes or were segregating fewer transgenes.

436  
437 YFP translational fusion TAN1 constructs were analyzed in *csH-tan* (*TAN1*, AT3G05330) *air9-31*  
438 (*AIR9*, AT2G34680) double mutants in *Landsberg erecta* (*Ler*) unless otherwise specified. The  
439 *pPOK1:YFP-POK1* transgene in Columbia, a kind gift from Sabine Müller (Lipka et al., 2014), was  
440 crossed into the *tan-mad* and *air9-5* Columbia/Wassilewskija double mutant previously described  
441 (Mir et al., 2018). *tan-mad* and *air9-5* mutants were genotyped with primers ATRP and ATLP (to  
442 identify wild-type *TAN1*), JL202 and ATLP (to identify T-DNA insertion in *TAN1*), AIR9-5RP and  
443 AIR9-5LP (to identify wild-type *AIR9*), and Lb1.3 and AIR9RP (to identify T-DNA insertion in *AIR9*)  
444 and by observation of the *tan1 air9* double mutant phenotype (Supplementary Table 1).

#### 445 446 Generation of Transgenic Lines

447 *Agrobacterium tumefaciens*-mediated floral dip transformation was used as described (Clough and  
448 Bent, 1999). *csH-tan air9-31* double mutants were used for all floral dip transformations unless  
449 otherwise specified. Transgenic plants were selected on 15 µg/mL glufosinate (Finale; Bayer) and  
450 screened by microscopy before being transferred to soil and selfed. *CFP-TUBULIN* was crossed into  
451 *35S:TAN1(28-33A)<sub>1-132</sub>-YFP tan1 air9* plants using *tan1 air9 CFP-TUBULIN* plants (Mir et al., 2018)  
452 and progeny were subsequently screened by microscopy for CFP and YFP signal. *csH-tan1 air9-31*  
453 double mutants were confirmed by genotyping with primers ATLP and AtTAN 733-CDS Rw (to  
454 identify *TAN1* wild-type), AtTAN 733-CDS Rw and Ds5-4 (to identify T-DNA insertion in *TAN1*),  
455 AIR9\_cDNA 2230 F and AIR9 gnm7511 R (to identify *AIR9* wild-type), and AIR9 gnm7511 R and  
456 Ds5-4 (to identify T-DNA insertion in *AIR9*).

457  
458 Columbia expressing the microtubule marker *UBQ10:mScarlet-MAP4* (Pan et al., 2020), a kind gift  
459 from Xue Pan and Zhenbiao Yang (UCR), was crossed to *tan-mad* and *air9-5*  
460 Columbia/Wassilewskija double mutants expressing *pPOK1:YFP-POK1*. Progeny were screened for  
461 mScarlet-MAP4 and YFP-POK1 by confocal microscopy and then selfed to recover *air9-5* single  
462 mutants, *tanmad* single mutants, and *air9-5 tan-mad* double mutants expressing *mScarlet-MAP4*  
463 and *YFP-POK1*.

464

465 *pTAN1:CFP-TAN1* and *pTAN1:CFP-TAN1(28-33A)* were introduced into *air9-5 tan-mad* double  
466 mutants expressing *mScarlet-MAP4* and *YFP-POK1* by *Agrobacterium tumefaciens*-mediated floral  
467 dip transformation. *pTAN1:CFP-TAN1* and *pTAN1:CFP-TAN1(28-33A)* transformants were selected  
468 on 100µg/mL gentamicin (Fisher Scientific) and the presence of *mScarlet-MAP4*, *YFP-POK1*, and  
469 either *CFP-TAN1* or *CFP-TAN1(28-33A)* was confirmed by confocal microscopy. 4 independent  
470 transformed lines for *pTAN:CFP-TAN1(28-33A)* and 3 independent transformed lines for unaltered  
471 *pTAN:CFP-TAN1* were examined for division site localization cell counts.

472

#### 473 Plasmid Construction

474 *TAN1<sub>1-132</sub>-YFP* coding sequences were subcloned by EcoRI and BamHI double digestion from the  
475 plasmid *pEZRK-LNY-TAN1<sub>1-132</sub>-YFP* described previously (Rasmussen et al., 2011) into *pEZT-NL*  
476 vector (a kind gift from David Ehrhardt, Carnegie Institute, Stanford University) and selected with  
477 glufosinate (Finale; Bayer). The CFP-TUBULIN (CFP-TUA6) vector was previously described, a kind  
478 gift from Viktor Kirik (Kirik et al., 2007).

479

480 Six amino acid alanine substitutions were generated using overlapping PCR (primers in  
481 Supplementary Table 1) beginning at amino acid 10 of *TAN1<sub>1-132</sub>*. *TAN1<sub>1-132</sub>-YFP* coding sequence  
482 from plasmids described previously was used as the PCR template (Rasmussen et al., 2011).  
483 *TAN1(28-33A)<sub>1-132</sub>-YFP* was subcloned by EcoRI BamHI double digestion into *pEZT-NL*. To generate  
484 *YFP-TAN1(28-33A)*, alanine substitutions were first introduced into G22672 (*TAN1* cDNA in  
485 *pENTR223*, from the Arabidopsis Biological Resource Center) using overlapping PCR with the same  
486 primers to generate *TAN1(28-33A)*. Gateway LR reaction (Fisher Scientific) was then used to  
487 subclone *TAN1(28-33A)* into *pEarley104* (Earley et al., 2006).

488

489 *pTAN:CFP-TAN1(28-33A)* was generated using overlapping PCR. The TANGLED1 native promoter  
490 was amplified from *Np:AtTAN-YFP* (Walker et al., 2007) using the primers *NpTANSacIFor* and  
491 *NpTANceruleanRev*. Cerulean was amplified from the Cerulean CDS in *pDONR221P4r/P3r* using  
492 the primers *NpTANceruleanFor* and *CeruleanpEarleyRev*. *TAN1(28-33A)* in *pEarley104* was  
493 amplified using *CeruleanpEarleyFor* and *pEarleyOCSPstIRev*. TANGLED1 native promoter,  
494 Cerulean, and *TAN1(28-33A)* were then combined using overlapping PCR using *NpTANSacI* and  
495 *pEarleyOCSPstIRev*. *pTAN:CFP-TAN1(28-33A)* was then subcloned into *pJHA212G*, a kind gift of  
496 Meng Chen (UCR), using *SacI* and *PstI* double digest. *pTAN:CFP-TAN1* was generated the same way  
497 as *pTAN:CFP-TAN1(28-33A)* except unaltered *TAN1* in *pEarley104* was amplified using  
498 *CeruleanpEarleyFor* and *pEarleyOCSPstIRev*.

499

#### 500 Microscopy

501 An inverted Ti Eclipse (Nikon) with motorized stage (ASI Piezo) and spinning-disk confocal  
502 microscope (Yokogawa W1) built by Solamere Technology was used with Micromanager software  
503 (micromanager.org). Solid-state lasers (Obis) and emission filters (Chroma Technology) were used.  
504 For CFP translational fusions excitation 445, emission 480/40 was used; YFP translational fusions  
505 excitation 514, emission 540/30; and propidium iodide (PI), Alexa-568 goat anti-mouse antibody,  
506 and *mScarlet-MAP4* excitation 561, emission 620/60 were used. The 20x objective has 0.75  
507 numerical aperture and the 60x objective has 1.2 numerical aperture which was used with

508 perfluorocarbon immersion liquid (RIAAA-6788 Cargille). Excitation spectra for mScarlet-MAP4  
509 and YFP-POK1 partially overlapped, which resulted in faint bleed through signal in the YFP channel  
510 for some dense microtubule structures (e.g. spindles and phragmoplasts). YFP-POK1 colocalization  
511 with PPBs was carefully determined based on distinct YFP-POK1 signal and the presence of  
512 cytosolic YFP-POK1.

513  
514 The ratio of the division site versus cytosolic fluorescence intensity was determined by taking the  
515 median YFP fluorescence intensity from the center Z-stack of individual cells with PPBs or  
516 phragmoplasts. For each cell the median fluorescence intensity was measured for two cytosolic  
517 areas and the division site on each side of the cell using circles with areas of  $0.875 \mu\text{m}^2$ . The sum of  
518 the median intensity at the division site on each side was then divided by the sum of the median  
519 intensity of the two cytosolic areas to calculate the ratio of the division site versus cytosolic  
520 fluorescence intensity. Fluorescence intensities were measured in FIJI. All plants used for this  
521 analysis were grown on the same day and imaged using identical conditions, and at least 5 plants of  
522 each genotype were examined.

523  
524 Measurements of PPB and phragmoplast angles and cell file rotation  
525 At least 3 biological replicates, grown on separate plates on separate days, composed of at least 15  
526 plants per genotype for PPB measurements and at least 8 plants per genotype for phragmoplast  
527 measurements were used to gather angle data. 8-day-old seedlings were stained with  $10 \mu\text{M}$  PI for  
528 1 minute and then destained in distilled water before imaging by confocal microscopy using a 20x  
529 or 60x objective. PPB and phragmoplast angles were measured using FIJI. The angle was measured  
530 between the left-hand cell wall and the orientation of the PPB or phragmoplast in the root tips of  
531 *tan1 air9* double mutants expressing *CFP-TUBULIN* or immunostained microtubules (described in  
532 the next section). Cell file rotation was examined by measuring from the left-hand side of the  
533 transverse cell wall relative to the long axis of the root in images of the differentiation zone stained  
534 with PI. The differentiation zone was identified by the presence of root hairs. Prism (GraphPad) and  
535 Excel (Microsoft Office) were used to perform statistical analyses and to plot data. F-test was used  
536 to compare normally distributed variances (PPB and phragmoplast angles) and Levene's test was  
537 used to compare non-normally distributed variances (cell file rotation angle measurements). *tan1*  
538 *air9* double mutants have non-normally distributed cell file twisting because the roots tend to twist  
539 to the left (Mir et al., 2018). Genotypes across biological replicates were compared to ensure there  
540 was no statistically significant difference between them before pooling data.

541  
542 Immunostaining  
543 *air9*, *tan1 air9 p35S:TAN1-YFP*, *tan1 air9 35S:YFP-TAN1(28-33A)*, and untransformed *tan1 air9*  
544 plants were stratified and then grown vertically on  $\frac{1}{2}$  MS plates in a growth chamber at  $22^\circ\text{C}$  with a  
545 16/8-h light/dark cycle for 8 days. The seedlings were screened by microscopy for YFP and then  
546 fixed and processed for immunofluorescence microscopy using a 1:2000 dilution of monoclonal  
547 anti- $\alpha$ -tubulin B-5-1-2 antibody (Life Technologies; 32-2500) followed by 1:2000 dilution of Alexa-  
548 568 goat anti-mouse antibody (Thermo Fisher; A-11004) as described previously (Sugimoto et al.,  
549 2000).

550

551 Yeast-two-hybrid

552 Six alanine substitutions were generated using overlapping PCR and TAN1 coding sequence in  
553 pEZRK-LNY-TAN1<sub>1-132</sub>-YFP as a template beginning at amino acid 10 of TAN1 and continuing  
554 through amino acid 123 according to (Russell and Sambrook, 2001). All except amino acids  
555 substitutions for 64-69 and 106-111 were cloned into pAS vector (Fan et al., 1997) using EcoRI  
556 BamHI double digestion. pBD-TAN1(28-33A) was generated by using primers Ala\_05\_FOR and  
557 Ala\_05\_REV to perform DpnI mediated site-directed mutagenesis by PCR (Fisher and Pei, 1997).  
558 pBD-TAN1 (Walker et al., 2007), and pAS-TAN1<sub>1-132</sub> (Rasmussen et al., 2011) were used as positive  
559 controls, while pAD-MUT was used as a negative control for testing interaction with pAD-POK1  
560 (Müller et al., 2006). pAD-POK1 and pAS-TAN1<sub>1-132</sub> constructs were co-transformed into yeast strain  
561 YRG2 according to manufacturer instructions (Stragene). Positive yeast-two-hybrid interaction was  
562 determined by the presence of growth on plates cultured at 30°C lacking histidine after 3 days.  
563 Plates were then scanned (Epson).

564

565 **Acknowledgements**

566 Thanks to Andrew Gomez (UCR, supported by USDA-NIFA 2017-38422-27135 ) for help with yeast-  
567 two-hybrid experiments, Prof. Sabine Müller (University of Tübingen) for YFP-POK1 seeds, and  
568 Profs. Meng Chen and David Nelson (UCR) for their helpful comments on alanine scanning  
569 mutagenesis. Thanks to Prof. Henrik Buschmann (Osnabrück University) for original *tan1 air9*  
570 characterization. Thanks to Lindy Allsman, Stephanie Martinez, and Aimee Uyehara (UCR) for  
571 helpful comments on the manuscript. NSF-CAREER #1942734 and NSF-MCB #1716972, USDA-  
572 NIFA-CA-R-BPS-5108-H are gratefully acknowledged for funding.

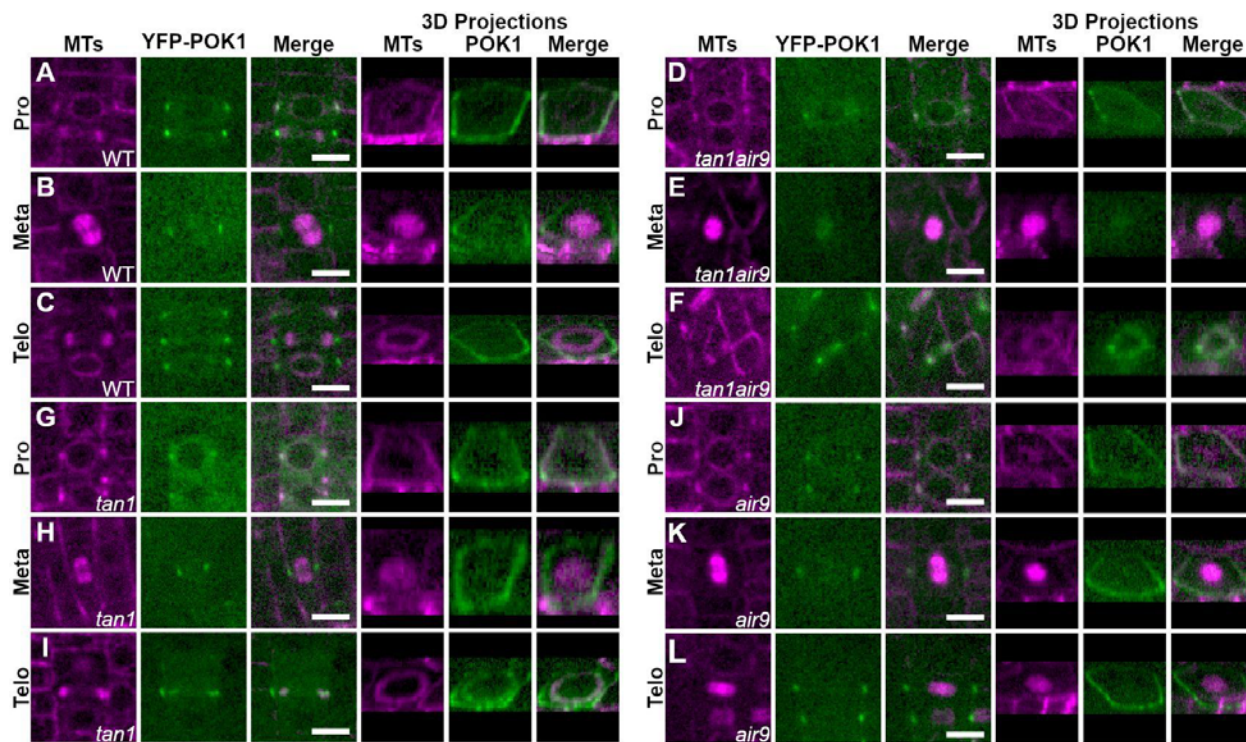

573  
 574 **Figure 1: TAN1 and AIR9 together promote POK1 maintenance at the division site.** YFP-POK1  
 575 localization in Col-0 wild-type plants, *tan1* single mutants, *air9* single mutants, and *tan1 air9* double  
 576 mutants expressing *UBQ10:mScarlet-MAP4* to mark microtubules and *pPOK1:YFP-POK1*. Scale bars  
 577 = 10  $\mu$ m. A-C) YFP-POK1 localization in Col-0 wild-type plants, N = 15 plants. A) YFP-POK1  
 578 localization during preprophase/prophase. In 71% of cells (50/70) YFP-POK1 colocalized with the  
 579 PPB. B) YFP-POK1 was observed to be maintained at the division site in metaphase and anaphase  
 580 cells in Col-0 plants (n = 13/13 metaphase cells, n = 3/3 anaphase cells). C) YFP-POK1 remains  
 581 clearly visible at the division site in Col-0 telophase cells (n = 31/31 cells). D-F) YFP-POK1  
 582 localization in *tan1 air9* double mutant plants, N = 19 plants. D) YFP-POK1 localization during  
 583 preprophase/prophase. In 50% of cells (27/54) YFP-POK1 colocalized with the PPB. E) YFP-POK1  
 584 was observed to be lost from the division site upon entry into metaphase (n = 0/21 cells) and was  
 585 absent in anaphase cells (n = 0/4 cells). F) In *tan1 air9* telophase cells YFP-POK1 was absent from  
 586 the division site and accumulated in the phragmoplast midline (n = 34/44 cells). G-I) YFP-POK1  
 587 localization in *tan1* single mutants, N = 17 plants. G) YFP-POK1 localization during  
 588 preprophase/prophase. In 64% of cells (54/85) YFP-POK1 colocalized with the PPB. H) YFP-POK1  
 589 was observed to be maintained at the division site in metaphase and anaphase cells in *tan1* plants  
 590 (n = 17/17 metaphase cells, n = 6/6 anaphase cells). I) YFP-POK1 remains clearly visible at the  
 591 division site in *tan1* telophase cells (n = 27/27 cells). J-L) YFP-POK1 localization in *air9* single  
 592 mutant plants (N = 15 plants). J) YFP-POK1 localization during preprophase/prophase. In 64% of  
 593 cells (46/72) YFP-POK1 colocalized with the PPB. K) YFP-POK1 was maintained at the division site  
 594 in metaphase and anaphase cells in *air9* plants (n = 24/24 metaphase cells, n = 4/4 anaphase cells).  
 595 L) YFP-POK1 remains clearly visible at the division site in *air9* telophase cells (n = 40/40 cells).

596  
 597



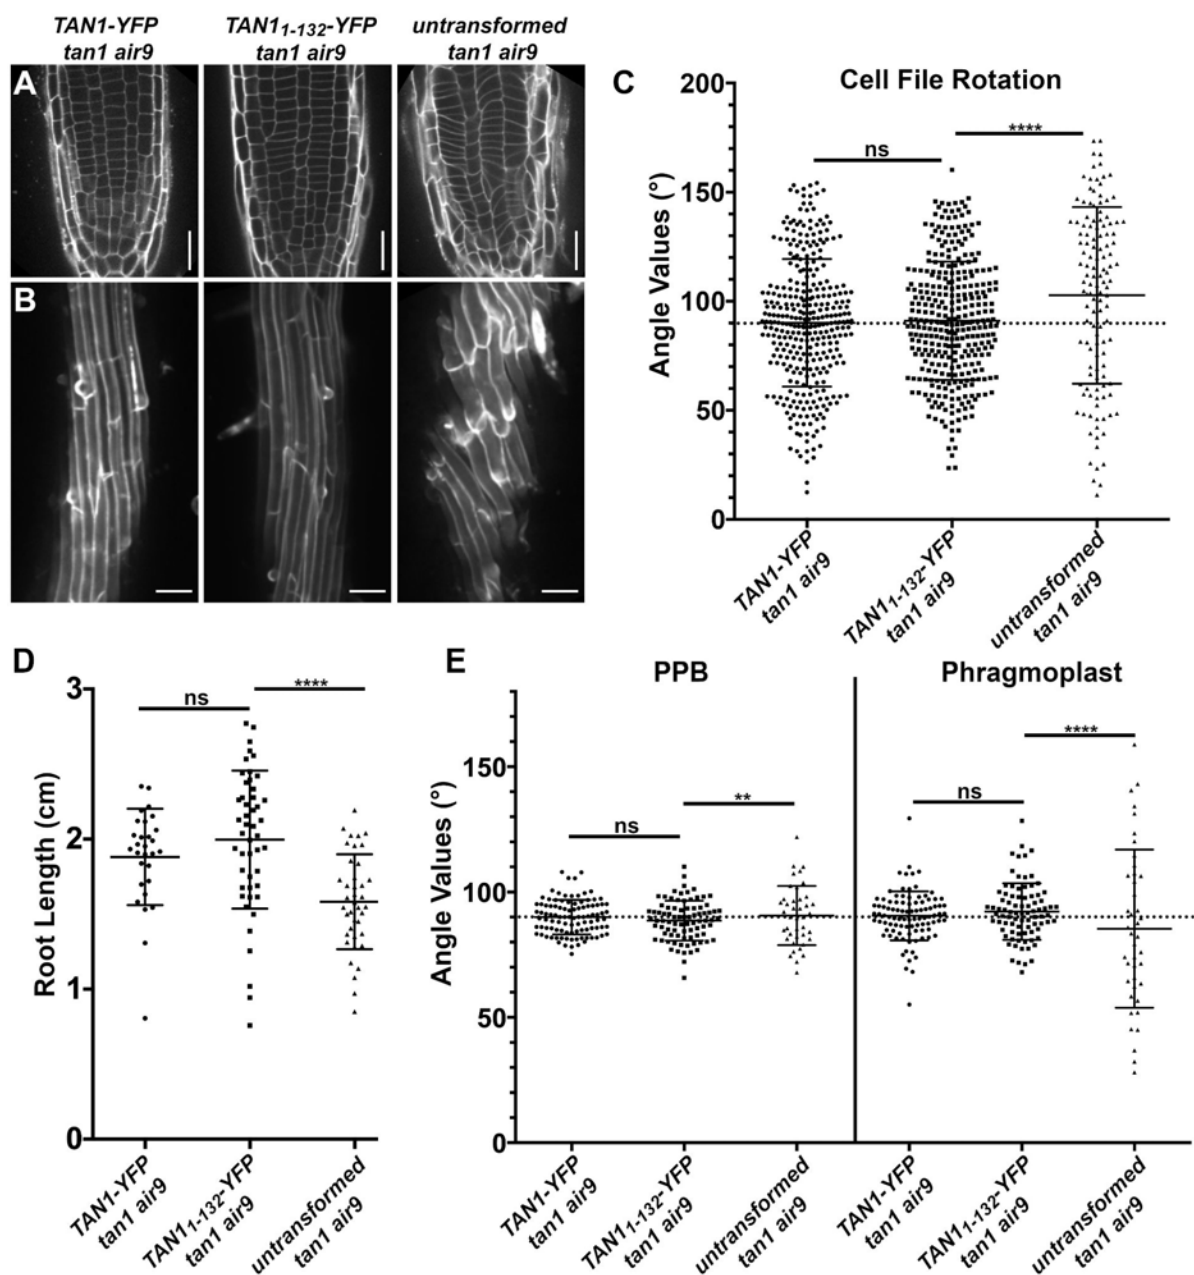

598  
599

600 **Figure 2. *p35S:TAN1*<sub>1-132</sub>-YFP rescues *Arabidopsis tan1 air9* double mutant phenotypes.** A)  
601 Cell walls stained with propidium iodide (PI) of *tan1 air9* double mutant root tips expressing  
602 *p35S:TAN1*-YFP (left), *p35S:TAN1*<sub>1-132</sub>-YFP (middle), and untransformed *tan1 air9* double mutants  
603 (right). Bars = 25 μm. B) Maximum projections of 10 1-μm Z-stacks of PI-stained differentiation  
604 zone root cell walls. Scale bars = 50 μm. C) Cell file rotation angles of *tan1 air9* double mutants  
605 expressing *p35S:TAN1*-YFP (left), *p35S:TAN1*<sub>1-132</sub>-YFP (middle) and untransformed plants (right), n  
606 > 13 plants for each genotype. Each dot represents an angle measured from the left side of the long  
607 axis of the root to the transverse cell wall. Angle variances were compared with Levene's test due to  
608 non-normal distribution. D) Root length measurements from 8 days after stratification of *tan1 air9*  
609 double mutants expressing *p35S:TAN1*-YFP (left), *p35S:TAN1*<sub>1-132</sub>-YFP (middle) and untransformed

610 plants (right), n > 28 plants for each genotype, compared by two-tailed t-test with Welch's  
611 correction. E) PPB and phragmoplast angle measurements in *tan1 air9* double mutant cells  
612 expressing p35S:*TAN1-YFP* (left), p35S:*TAN1<sub>1-132</sub>-YFP* (middle) and untransformed plants (right), n  
613 > 20 plants for each genotype. Angle variations compared with F-test. ns indicates not significant,  
614 \*\* P-value <0.01, \*\*\*\* P-value <0.0001.

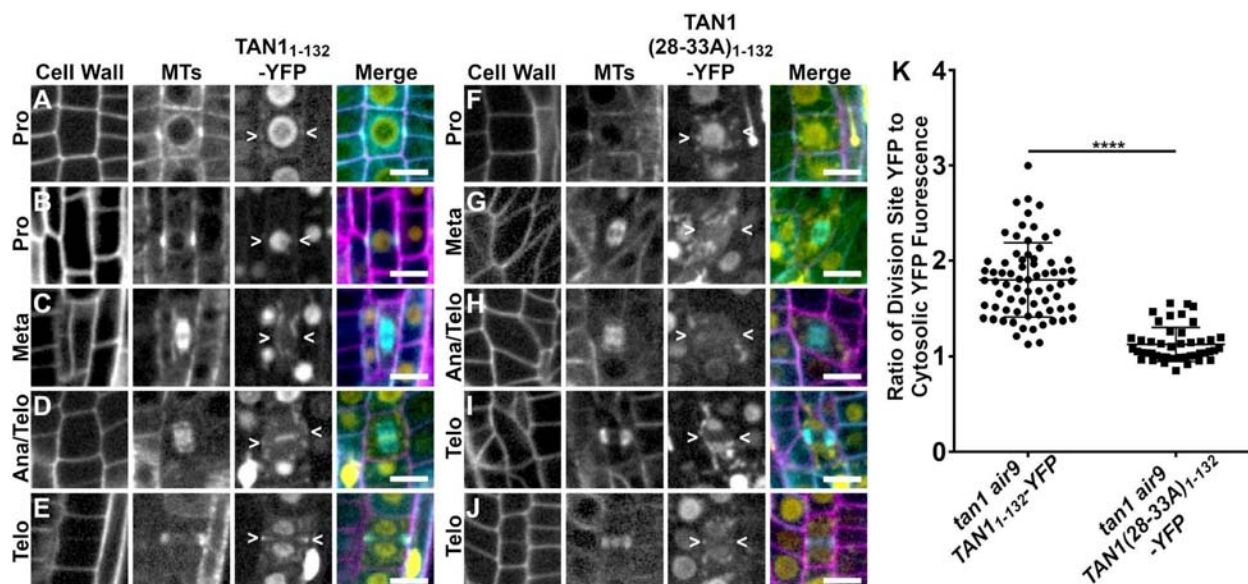

615  
 616 **Figure 3: Division site localization during telophase is common for  $TAN1_{1-132}$ -YFP but rare**  
 617 **for  $TAN1(28-33A)_{1-132}$ -YFP in  $tan1\ air9$  double mutants.** A-E) Propidium iodide stained  $tan1$   
 618  $air9$  plants expressing  $p35S:TAN1_{1-132}$ -YFP during mitosis (n = 29 plants). The division site is  
 619 indicated by arrowheads in the YFP panels. Scale bars = 10  $\mu$ m. A) Rare prophase division site  
 620 accumulation of  $TAN1_{1-132}$ -YFP, (10%, n = 9/89 cells), (B) common prophase  $TAN1_{1-132}$ -YFP nuclear  
 621 accumulation without division site localization (90%, n = 80/89 cells), (C) no specific  $TAN1_{1-132}$ -YFP  
 622 division site accumulation in metaphase (100%, n = 28/28 cells), (D) faint  $TAN1_{1-132}$ -YFP  
 623 division site accumulation accompanied by midline accumulation in late anaphase/early telophase (80%, n  
 624 = 16/20 cells) and E)  $TAN1_{1-132}$ -YFP division site accumulation during telophase (100%, n = 58/58  
 625 cells). F-H)  $tan1\ air9$  plants expressing  $p35S:TAN1(28-33A)_{1-132}$ -YFP during mitosis (n = 13 plants).  
 626 The division site is indicated by arrowheads in the YFP panels. F) No specific  $TAN1(28-33A)_{1-132}$ -  
 627 YFP prophase division site accumulation during prophase (100%, n = 20/20 cells), (G) no specific  
 628  $TAN1(28-33A)_{1-132}$ -YFP division site accumulation during metaphase (100%, n = 12/12 cells), (H)  
 629 no  $TAN1(28-33A)_{1-132}$ -YFP division site or midline accumulation in late anaphase/early telophase  
 630 (100%, n = 8/8 cells), (I) no specific  $TAN1(28-33A)_{1-132}$ -YFP division site accumulation during  
 631 telophase (68%, n = 15/22 cells) and (J) faint  $TAN1(28-33A)_{1-132}$ -YFP division site accumulation  
 632 during telophase (32%, n = 7/22 cells). K) Ratio of  $TAN1_{1-132}$ -YFP (left) or  $TAN1(28-33A)_{1-132}$ -YFP  
 633 (right) fluorescence at the division site to cytosolic fluorescence from  $tan1\ air9$  plants expressing  
 634  $p35S:TAN1_{1-132}$ -YFP or  $p35S:TAN1(28-33A)_{1-132}$ -YFP during telophase, n >23 plants for each  
 635 genotype. Asterisks indicate a significant difference as determined by Mann-Whitney U test, P-value  
 636 <0.0001.

637  
638

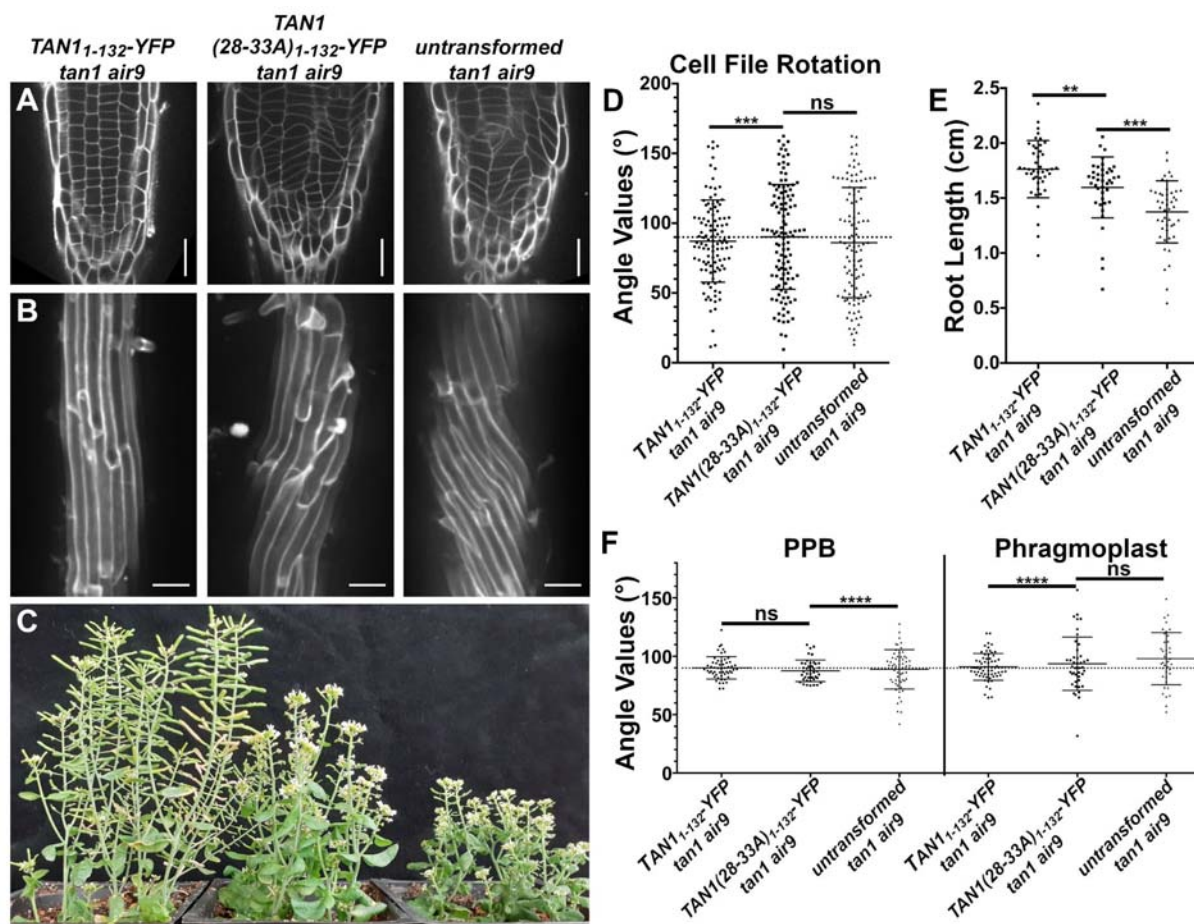

639  
640

641 **Figure 4: *p35S:TAN1(28-33A)<sub>1-132</sub>-YFP* partially rescues *tan1 air9* double mutant phenotypes.**

642 A) Cell walls of Arabidopsis *tan1 air9* double mutant root tips stained with propidium iodide (PI) of  
643 plants expressing *p35S:TAN1<sub>1-132</sub>-YFP* (left), *p35S:TAN1(28-33A)<sub>1-132</sub>-YFP* (middle), and  
644 untransformed *tan1 air9* double mutants (right). Scale bars = 25 µm. B) Maximum projections of 10  
645 1-µm Z-stacks of PI-stained differentiation zone root cell walls. Scale bars = 50 µm. C) 58-day old  
646 *tan1 air9* double mutants expressing *p35S:TAN1<sub>1-132</sub>-YFP* (left), *p35S:TAN1(28-33A)<sub>1-132</sub>-YFP*  
647 (middle), and untransformed *tan1 air9* double mutants (right). D) Cell file rotation angles of *tan1*  
648 *air9* double mutants expressing *p35S:TAN1<sub>1-132</sub>-YFP* (left), *p35S:TAN1(28-33A)<sub>1-132</sub>-YFP* (middle),  
649 and untransformed *tan1 air9* double mutants (right) n > 27 plants for each genotype. Variances  
650 were compared with Levene's test. E) Root length measurements from 8 days after stratification of  
651 *tan1 air9* double mutants expressing *p35S:TAN1<sub>1-132</sub>-YFP* (left), *p35S:TAN1(28-33A)<sub>1-132</sub>-YFP*  
652 (middle), and untransformed *tan1 air9* double mutants (right), n > 40 plants for each genotype,  
653 two-tailed t-test with Welch's correction. F) PPB and phragmoplast angle measurements in dividing  
654 root cells of *tan1 air9* double mutants expressing *p35S:TAN1<sub>1-132</sub>-YFP* (left), *p35S:TAN1(28-33A)<sub>1-132</sub>-*  
655 *YFP* (middle), and untransformed plants (right), n > 17 plants for each genotype. Angle variance  
656 compared with F-test. ns indicates not significant, \*\* P-value < 0.01, \*\*\* P-value < 0.001, \*\*\*\* P-value  
657 < 0.0001.

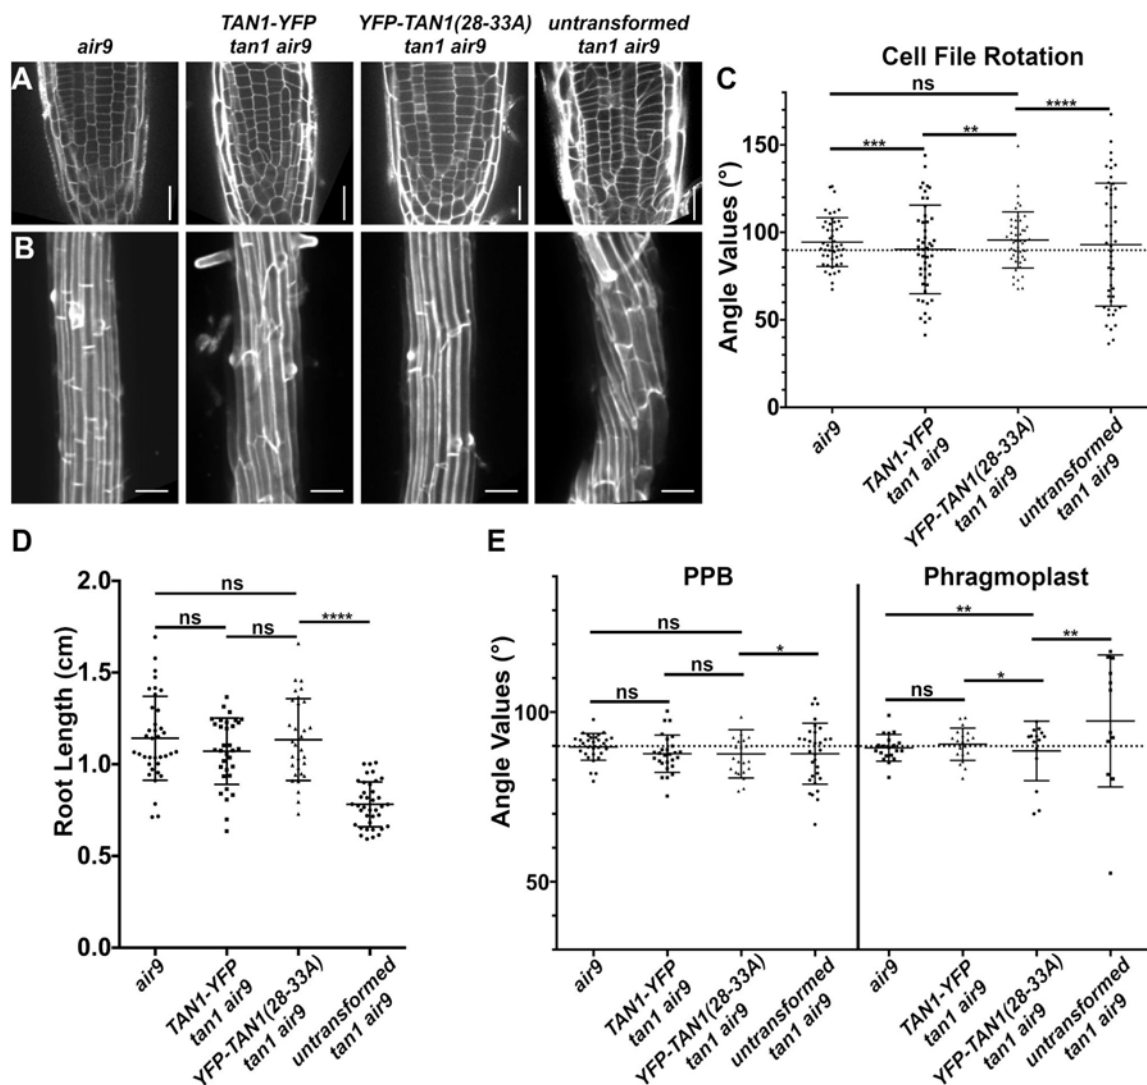

658  
659

660 **Figure 5: Full length *TAN1* with alanine substitutions replacing amino acids 28 to 33**  
 661 **(*p35S:YFP-TAN1(28-33A)*) mostly rescues the *tan1 air9* double mutant.** A) Propidium iodide  
 662 stained root tips of an *air9* single mutant (left) and *tan1 air9* double mutants expressing  
 663 *p35S:TAN1-YFP* (center left) or *p35S:YFP-TAN1(28-33A)* (center right), and an untransformed *tan1*  
 664 *air9* plant (right). Scale bars = 25  $\mu$ m. B) Maximum projections of 10 1- $\mu$ m Z-stacks of PI-stained  
 665 cell walls in the root differentiation zone. Scale bars = 50  $\mu$ m. C) Cell file rotation angles of *air9*  
 666 single mutants (left), *tan1 air9* double mutant plants expressing *p35S:TAN1-YFP* (center left) or  
 667 *p35S:YFP-TAN1(28-33A)* (center right), and untransformed *tan1 air9* plants (right),  $n > 9$  plants for  
 668 each genotype. Variances were compared with Levene's test. D) Root length measurements from 8  
 669 days after stratification of *air9* single mutants (left) and *tan1 air9* double mutants expressing  
 670 *p35S:TAN1-YFP* (center left) or *p35S:YFP-TAN1(28-33A)* (center right), and untransformed *tan1*  
 671 *air9* plants (right),  $n > 30$  plants of each genotype, compared by two-tailed t-test with Welch's  
 672 correction. E) PPB and phragmoplast angle measurements in dividing root cells of *air9* single  
 673 mutants (left) and *tan1 air9* double mutant plants expressing *p35S:TAN1-YFP* (center left) or  
 674 *p35S:YFP-TAN1(28-33A)* (center right), and untransformed *tan1 air9* plants (right), PPB

675 measurements n > 15 plants for each genotype; phragmoplast measurements n > 8 plants for each  
676 genotype. Angle variance compared with F-test. ns indicates not significant, \* P-value <0.05, \*\* P-  
677 value <0.01, \*\*\* P-value <0.001, \*\*\*\* P-value <0.0001.

678

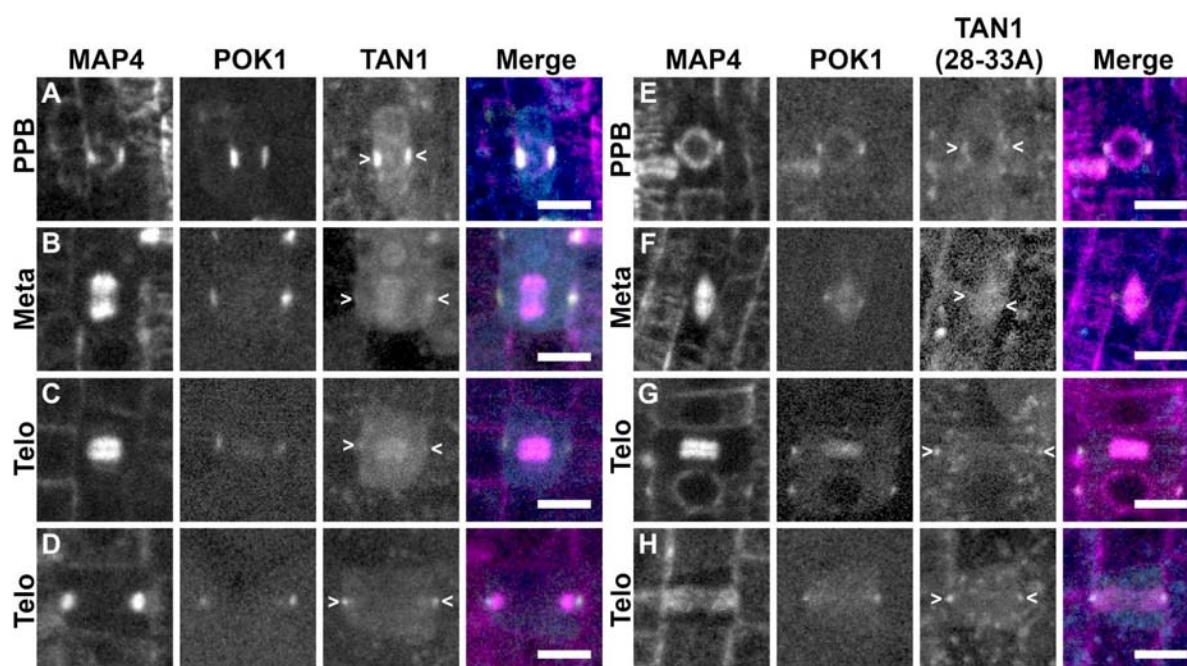

679

680

681 **Figure 6: CFP-TAN1(28-33A) and YFP-POK1 exhibit impaired recruitment to the division site**  
 682 **in the *tan1 air9* double mutant.** YFP-POK1 localization in *tan1 air9* double mutants expressing  
 683 *UBQ10:mScarlet-MAP4* and either (A-D) *pTAN1:CFP-TAN1* (n = 20 plants) or (E-I) *pTAN1:CFP-*  
 684 *TAN1(28-33A)* (n = 22 plants). Maximum projections of 3 1- $\mu$ m Z-stacks. Scale bars = 10  $\mu$ m. Some  
 685 bleed through from the mScarlet channel can be seen in the YFP-POK1 panels. A) YFP-POK1 and  
 686 CFP-TAN1 colocalized with the PPB in 72% of cells (n = 59/82 cells). B) YFP-POK1 and CFP-TAN1  
 687 were maintained at the division site in metaphase 13/13 and anaphase 4/4 cells. C) YFP-POK1 and  
 688 CFP-TAN1 were maintained at the division site in all early telophase cells (n = 14/14 cells) and late  
 689 telophase (n = 63/63 cells). E) YFP-POK1 and CFP-TAN1(28-33A) colocalized with the PPB in 41%  
 690 of cells (n = 32/79 cells). F) YFP-POK1 and CFP-TAN1(28-33A) were maintained at the division site  
 691 in 58% of metaphase cells (n = 11/19 cells). CFP-TAN1(28-33A) was faint at the division site. G)  
 692 Both YFP-POK1 and CFP-TAN1(28-33A) were observed at the division site in 65% of early  
 693 telophase cells (n = 20/31 cells). H) YFP-POK1 and CFP-TAN1(28-33A) were recruited to the  
 694 division site in 90% of late telophase cells (n = 53/59 cells). Some late telophase cells were  
 695 observed to have CFP-TAN1(28-33A) but not YFP-POK1 at the division site (7%, n = 4/59 cells) or  
 696 neither CFP-TAN1(28-33A) or YFP-POK1 at the division site (3% n = 2/59 cells).

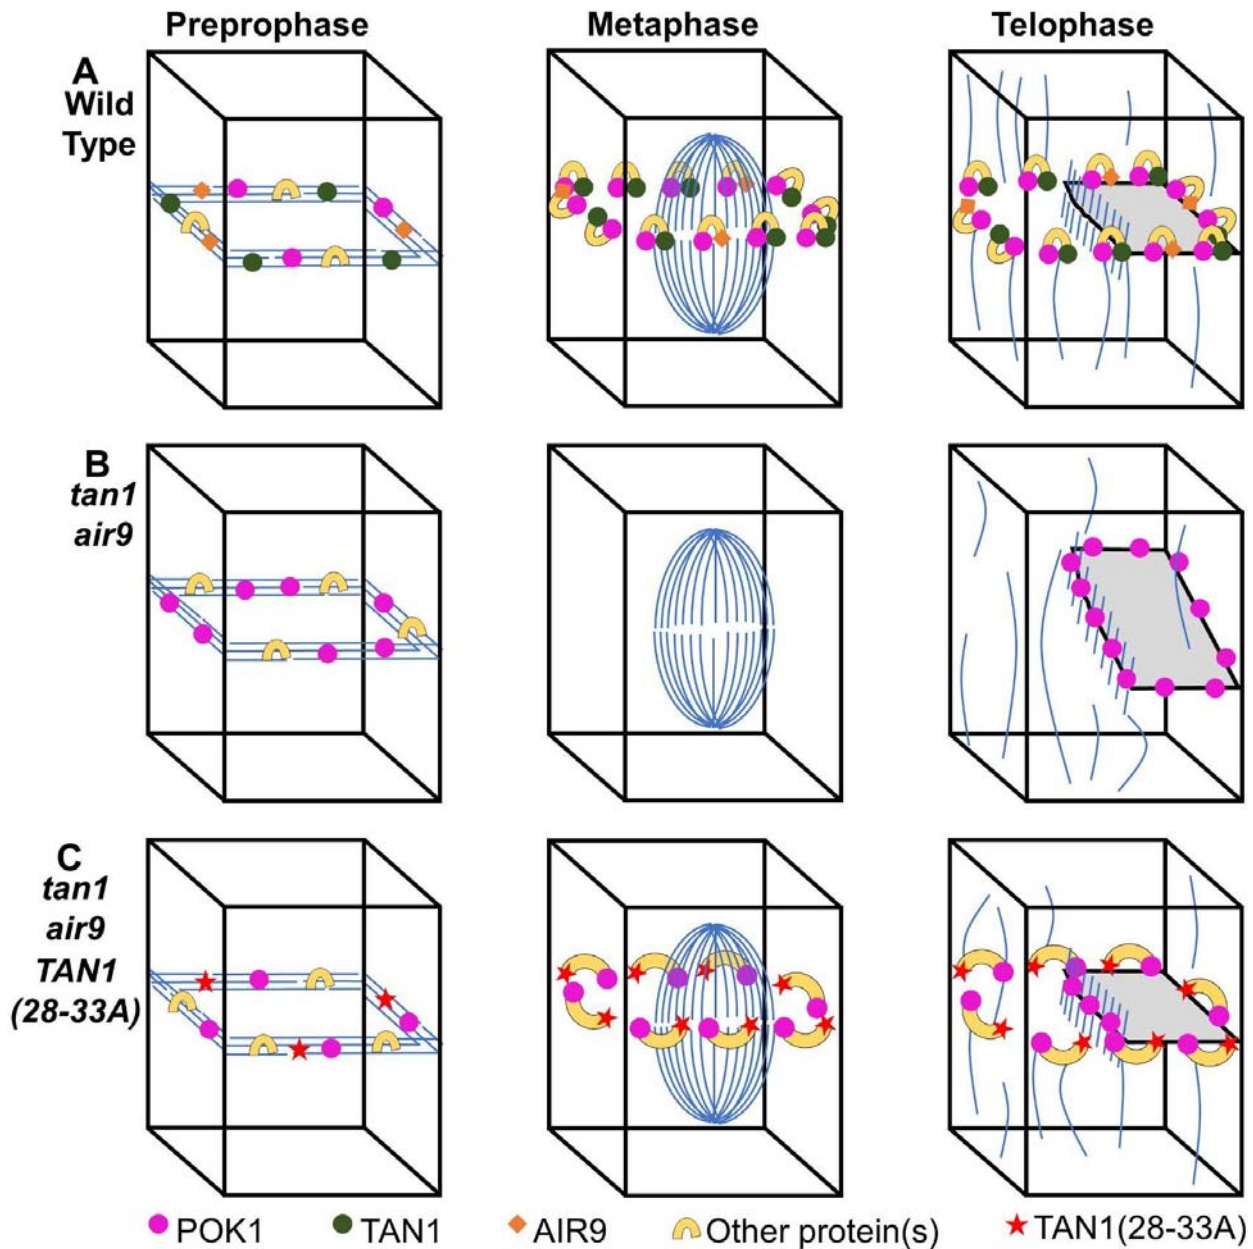

697  
698

699 **Figure 7: A speculative model on TAN1, AIR9, and POK1 interactions to ensure correct**  
 700 **division plane orientation.** A) In wild-type (WT) cells, AIR9, TAN1, and POK1 are recruited  
 701 independently of one another to the PPB. Interaction between TAN1 and POK1 maintain both  
 702 proteins at the division site through telophase, with AIR9 being re-recruited to the division site in  
 703 late telophase. B) In the *tan1 air9* double mutant, TAN1, AIR9, and potential AIR9/POK1 interacting  
 704 proteins are recruited to the PPB. Upon disassembly of the PPB, POK1 is lost from the division site  
 705 and during telophase aberrantly accumulates in the phragmoplast midline. Due to the loss of TAN1  
 706 and POK1 from the division site, the phragmoplast is not guided to the location defined by the PPB.



707 C) In *tan1 air9* double mutants expressing *TAN1(28-33A)*, TAN1(28-33A) and POK1 are recruited to  
708 the PPB independently of one another. POK1 and TAN1(28-33A) are partially maintained in some  
709 metaphase and early telophase cells possibly by interactions with other proteins. However, due to  
710 the inability of TAN1(28-33A) and POK1 to interact with one another, both proteins are not  
711 efficiently maintained at the division site. The majority (90%) of late telophase cells contain both  
712 POK1 and TAN1(28-33A) at the division site. Late recruitment of POK1 and TAN1(28-33A) may  
713 help guide the phragmoplast to the correct division site in a majority of cells.

714 **Table 1. YFP-POK1 division site and phragmoplast midline accumulation in wild-type, *tan1*,**  
 715 ***air9*, and *tan1 air9* double mutant plants.** Statistically significant differences were determined  
 716 using Fisher's exact test with Bonferroni correction - for 4 sample types,  $P < 0.0125$  is significant.  
 717 P-values are in parentheses. Stars indicate significant differences; ns indicates not significant.  
 718 Magenta represents YFP-POK1, blue represents microtubules, and light gray represents the cell  
 719 plate in schematics.  
 720

| Schematic                                                                           | Description                                                          | Wild-type, N = 15 plants | <i>tan1 air9</i> , N = 19 plants                           | <i>tan1</i> , N = 17 plants   | <i>air9</i> , N = 15 plants |
|-------------------------------------------------------------------------------------|----------------------------------------------------------------------|--------------------------|------------------------------------------------------------|-------------------------------|-----------------------------|
| 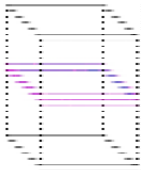   | PPB, POK1 at the division site                                       | 71%, n = 50/70           | 50%, n = 27/54 (p = 0.0165, ns with Bonferroni correction) | 64%, n = 54/85 (ns)           | 64%, n = 46/72 (ns)         |
|    | Metaphase, POK1 at the division site                                 | 100%, n = 13/13          | 0%, n = 0/21*** (p < 0.00001)                              | 100%, n = 17/17 (ns)          | 100%, n = 24/24 (ns)        |
|  | Telophase, POK1 at the division site only                            | 87%, n = 27/31           | 0%, n = 0/44 *** (p < 0.00001)                             | 56%, n = 15/27** (p = 0.0094) | 90%, n = 36/40 (ns)         |
|  | Telophase, POK1 at the division site and in the phragmoplast midline | 13%, n = 4/31            | 0%, n = 0/44 (p = 0.0259, ns with Bonferroni correction)   | 44%, n = 12/27** (p = 0.0094) | 10%, n = 4/40 (ns)          |
|  | Telophase, POK1 in phragmoplast midline but NOT at the division site | 0%, n = 0/31             | 77%, n = 34/44*** (p < 0.00001)                            | 0%, n = 0/27 (ns)             | 0%, n = 0/40 (ns)           |

721 **Table 2. POK1 and TAN1 or TAN1(28-33) localization to the division site in *tan1 air9* double**  
 722 **mutants.** Statistically significant differences were determined using Fisher's exact test. NS indicates  
 723 not significant. Brown represents dual localization of YFP-POK1 and either CFP-TAN1 or CFP-

724 TAN1(28-33A), magenta is YFP-POK1 alone, green is CFP-TAN1(28-33A) alone, blue lines are  
 725 microtubules, and light gray represents the cell plate in schematics.  
 726

| Schematic                                                                           | Description                                                                                | <i>tan1 air9</i> CFP-TAN1,<br>N = 20 plants | <i>tan1 air9</i> CFP-TAN1(28-33A),<br>N = 22 plants |
|-------------------------------------------------------------------------------------|--------------------------------------------------------------------------------------------|---------------------------------------------|-----------------------------------------------------|
| 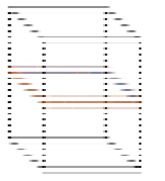   | PPB, Both POK1 and TAN1                                                                    | 72%, n = 59/82                              | 41%, n = 32/79 *** (p = 0.001)                      |
|    | PPB, POK1 only                                                                             | 6%, n = 5/82                                | 16%, n = 13/79* (p = 0.461)                         |
|   | Metaphase, Both POK1 and TAN1 at the division site                                         | 100%, n = 13/13                             | 58%, n = 11/19** (p = 0.0104)                       |
|  | Early Telophase, Both POK1 and TAN1 at the division site                                   | 100%, n = 14/14                             | 39%, n = 12/31*** (p = 0.0001)                      |
|  | Early Telophase, Both POK1 and TAN1 at the division site, POK1 in the phragmoplast midline | 0%, n = 0/14                                | 26%, n = 8/31* (p = 0.0436)                         |
|  | Early Telophase, NO POK1 or TAN1 at division site or phragmoplast midline                  | 0%, n = 0/14                                | 35%, n = 11/31** (p = 0.098)                        |
|  | Late Telophase, Both POK1 and TAN1 at the division site only                               | 95%, n = 60/63                              | 71%, n = 42/59*** (p = 0.0004)                      |

|                                                                                   |                                                                                         |              |                               |
|-----------------------------------------------------------------------------------|-----------------------------------------------------------------------------------------|--------------|-------------------------------|
| 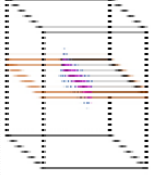 | Late Telophase, POK1 and TAN1 at the division site and POK1 in the phragmoplast midline | 5%, n = 3/63 | 19%, n = 11/59* (p = 0.022)   |
|  | Late Telophase, TAN1 only at the division site                                          | 0%, n = 0/63 | 7%, n = 4/59 (NS, p = 0.0518) |
|  | Late Telophase, Neither TAN1 or POK1 at division site or in the phragmoplast midline    | 0%, n = 0/63 | 3%, n = 2/59 (NS, p = 0.2318) |

727  
 728  
 729  
 730  
 731  
 732  
 733  
 734  
 735  
 736  
 737  
 738  
 739  
 740  
 741  
 742  
 743  
 744  
 745  
 746  
 747

748 **Supplementary Figures**

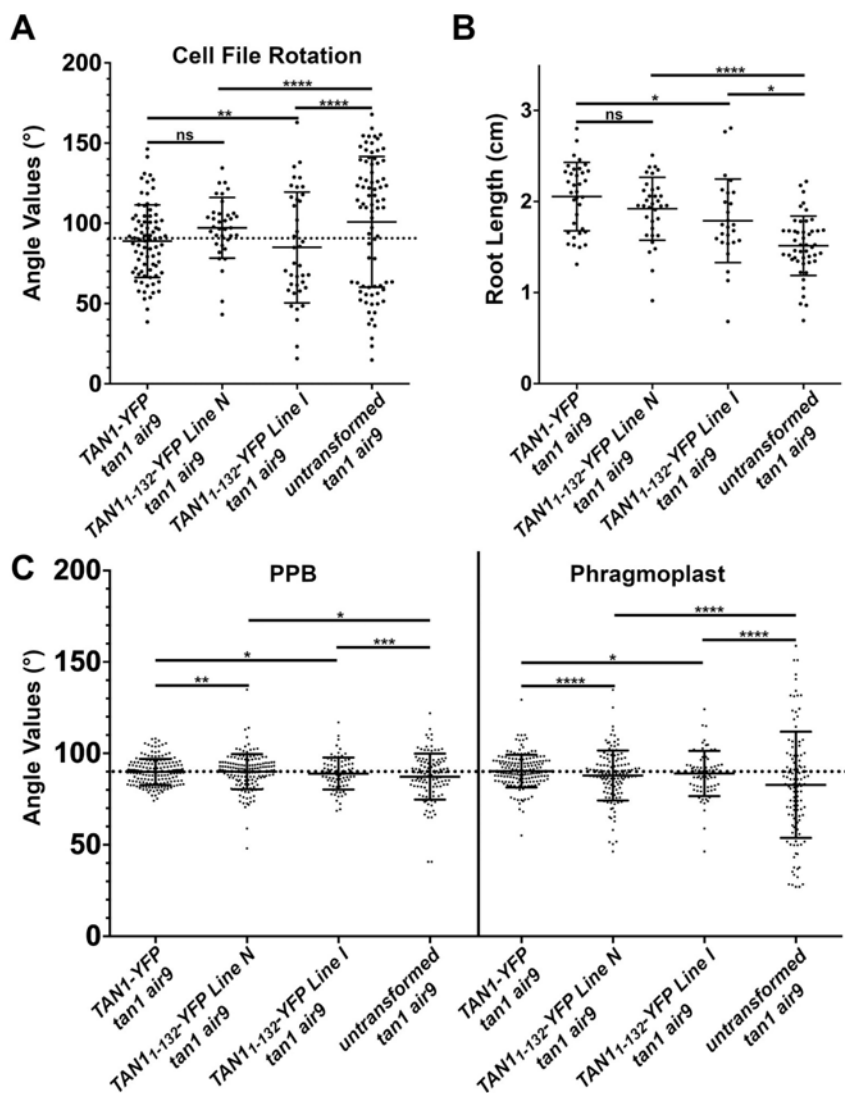

749  
 750 **Supplementary Figure 1. *p35S:TAN1<sub>1-132</sub>-YFP tan1 air9* lines show significant rescue**  
 751 **compared to untransformed *tan1 air9* double mutants.** A) Cell file rotation angles of *tan1 air9*  
 752 double mutants expressing *p35S:TAN1-YFP* (left), two *p35S:TAN1<sub>1-132</sub>-YFP* transgenic lines  
 753 designated as line N (center left) and line I (center right) and untransformed *tan1 air9* plants  
 754 (right)  $n > 6$  plants for each genotype. Angle variances were compared with Levene's test. B) Root  
 755 length measurements from 8 days after stratification of *tan1 air9* double mutants expressing  
 756 *p35S:TAN1-YFP* (left), two *p35S:TAN1<sub>1-132</sub>-YFP* transgenic lines (middle) and untransformed plants  
 757 (right),  $n > 13$  plants for each genotype, compared by two-tailed t-test with Welch's correction. C)  
 758 PPB and phragmoplast angle measurements in dividing root cells of *tan1 air9* double mutants  
 759 expressing *p35S:TAN1-YFP* (left), two *p35S:TAN1<sub>1-132</sub>-YFP* transgenic lines (middle) and  
 760 untransformed plants (right),  $n > 23$  plants of each genotype. Angle variations compared with F-  
 761 test. ns indicates not significant, \* P-value  $< 0.05$ , \*\* P-value  $< 0.01$ , \*\*\*\* P-value  $< 0.0001$ .

762  
 763

764  
765  
766

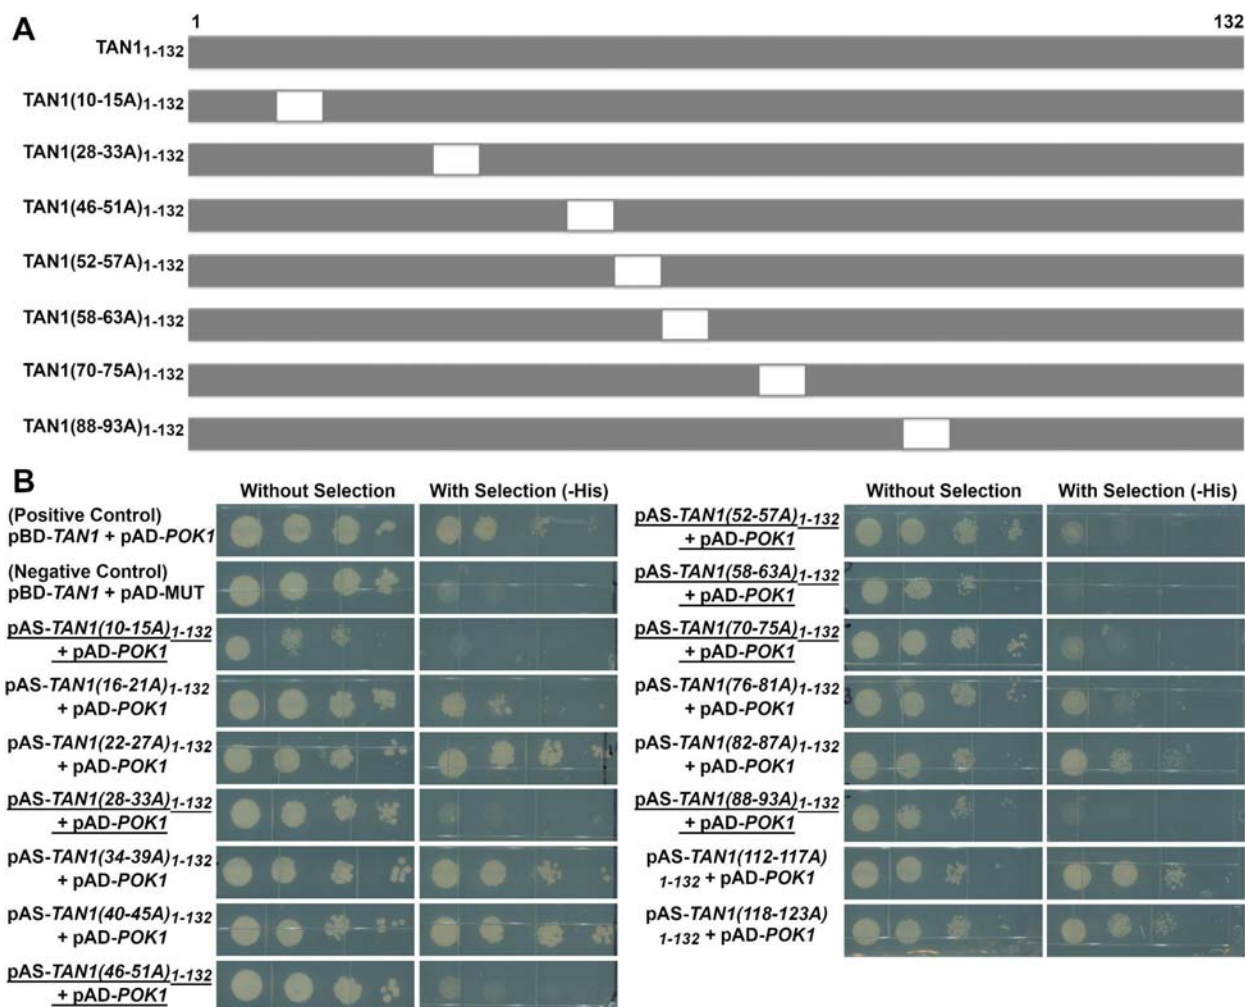

767  
768  
769  
770  
771  
772  
773  
774  
775  
776  
777  
778  
779

**Supplementary Figure 2. Yeast-two-hybrid interactions between POK1 (C-terminal amino acids 1683-2066, as previously described (Müller et al., 2006; Rasmussen et al., 2011; Lipka et al., 2014) ) and TAN1<sub>1-132</sub> alanine scanning constructs.** A) Diagram of alanine scanning constructs that showed loss of interaction with POK1 by yeast-two-hybrid. The location of the six alanine substitutions within each TAN1<sub>1-132</sub> construct are represented by white boxes. B) Yeast-two-hybrid results of screen for loss of interaction with POK1. Underlined constructs showed loss of interaction with POK1. Alanines 64-69 and 106-111 were not completed and not included in the yeast-two-hybrid.

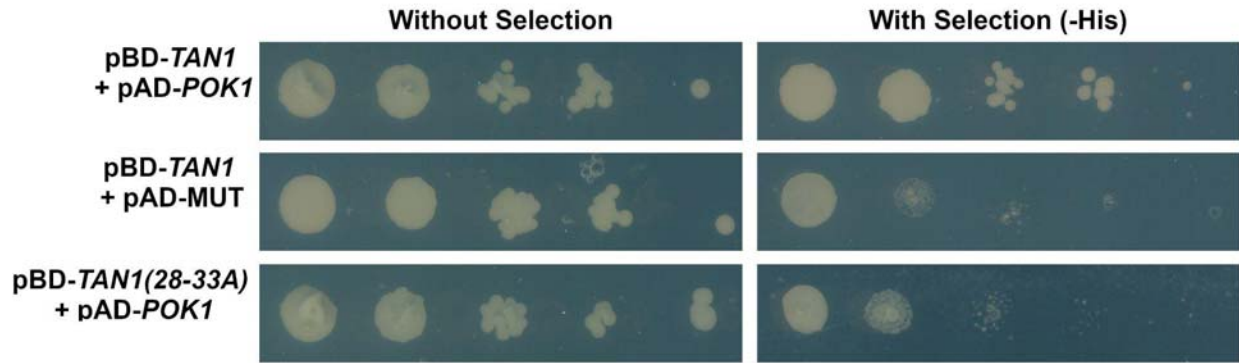

780

781

782 **Supplementary Figure 3. Yeast-two-hybrid interactions between TAN1 and POK1 (C-**  
783 **terminal amino acids 1683-2066, as previously described (Müller et al., 2006; Rasmussen et al.,**  
784 **2011; Lipka et al., 2014) ) and TAN1(28-33A). Full-length TAN1(28-33A) does not interact with**  
785 **POK1 by yeast-two-hybrid.**

786

787  
788

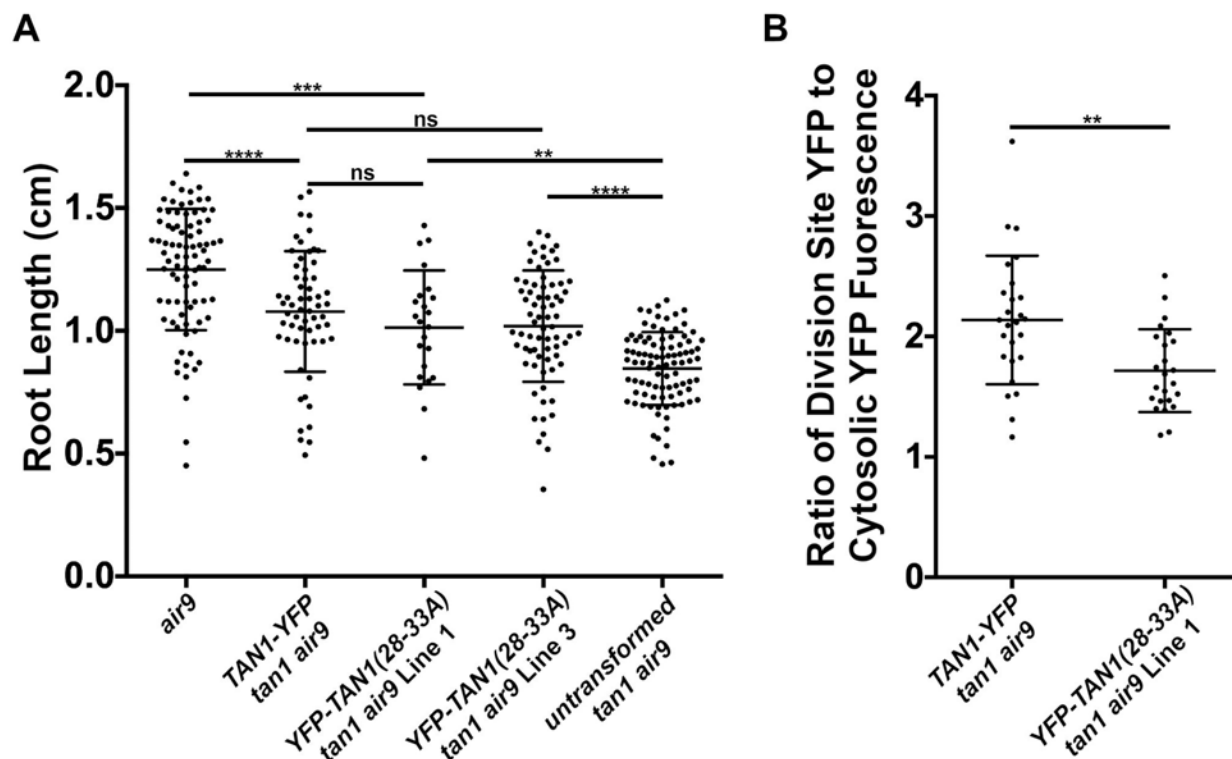

789  
790

791 **Supplementary Figure 4. *p35S:YFP-TAN1(28-33A) tan1 air9* lines show significant rescue**  
792 **compared to untransformed *tan1 air9*, but less accumulation of YFP-TAN1(28-33A) during**  
793 **telophase.** A) Root length measurements from 8 days after stratification of *air9* single mutants  
794 (left), *tan1 air9* double mutants expressing *p35S:TAN1-YFP* (second from the left), two *p35S:YFP-*  
795 *TAN1(28-33A)-YFP* transgenic lines designated as line 1 (center) and line 3 (second from the right),  
796 and untransformed plants (right),  $n > 22$  plants for each genotype, compared by two-tailed t-test  
797 with Welch's correction. B) Ratio of TAN1-YFP or TAN1(28-33A)-YFP fluorescence at the division  
798 site to cytosolic fluorescence from *tan1 air9* plants expressing *p35S:TAN1-YFP* (left) or *p35S:YFP-*  
799 *TAN1(28-33A)* (right) during telophase,  $n > 12$  plants for each genotype. Asterisks indicate a  
800 significant difference as determined by Mann-Whitney U test. ns indicates not significant, \*\* P-value  
801  $< 0.01$ , \*\*\* P-value  $< 0.001$ , \*\*\*\* P-value  $< 0.0001$ . Note: TAN1-YFP fluorescence measurements are  
802 the same as those used for the telophase fluorescence measurements in supplementary figure 5E.

803  
804  
805  
806  
807  
808  
809  
810  
811



812

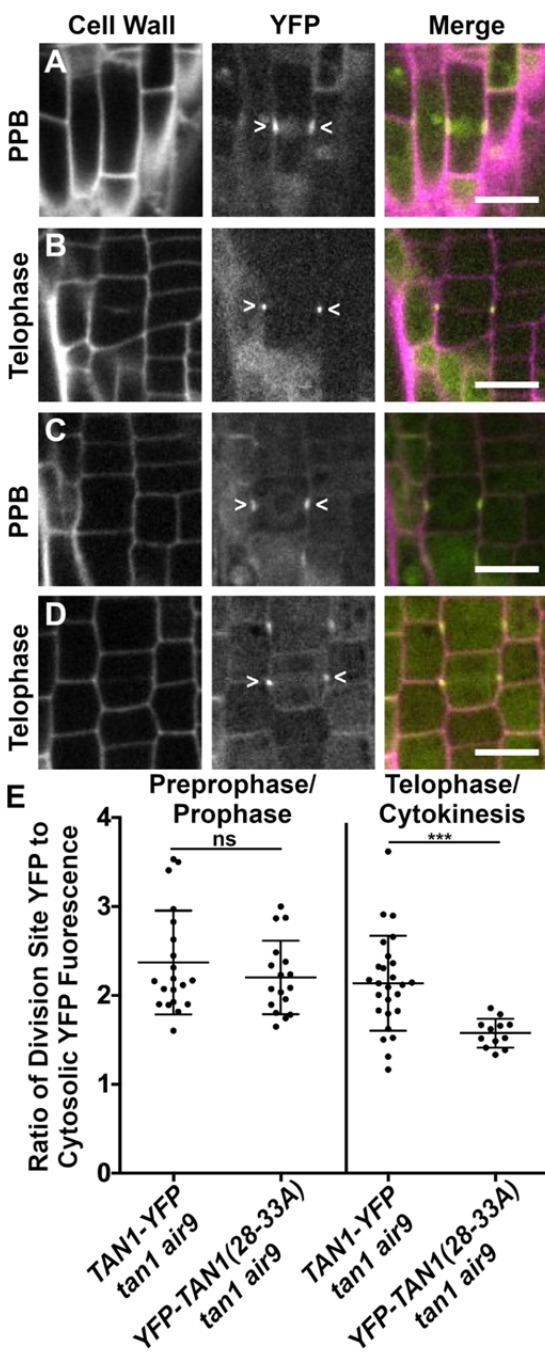

**Supplementary Figure 5. YFP-TAN1(28-33A) localizes to the division site in preprophase or prophase and with reduced fluorescence during telophase in *tan1 air9* mutants.** Propidium iodide stained *tan1 air9* plants expressing *p35S:TAN1-YFP* in (A) preprophase or prophase (B) telophase or cytokinesis. *tan1 air9* plants expressing *p35S:YFP-TAN1(28-33A)* in (C) preprophase or prophase (D) telophase or cytokinesis. The division site is indicated by arrowheads in the YFP panels. Bars = 10 μm. E) TAN1-YFP or TAN1(28-33A)-YFP ratio of the division site versus cytosolic fluorescence intensity from *tan1 air9* plants expressing *p35S:TAN1-YFP* or *p35S:YFP-TAN1(28-33A)* during preprophase or prophase and telophase or cytokinesis, n >5 plants for each genotype. Ratios compared with Mann-Whitney U test. ns indicates not significant, \*\*\* P-value < 0.001.

848

849  
850  
851  
852  
853  
854

855

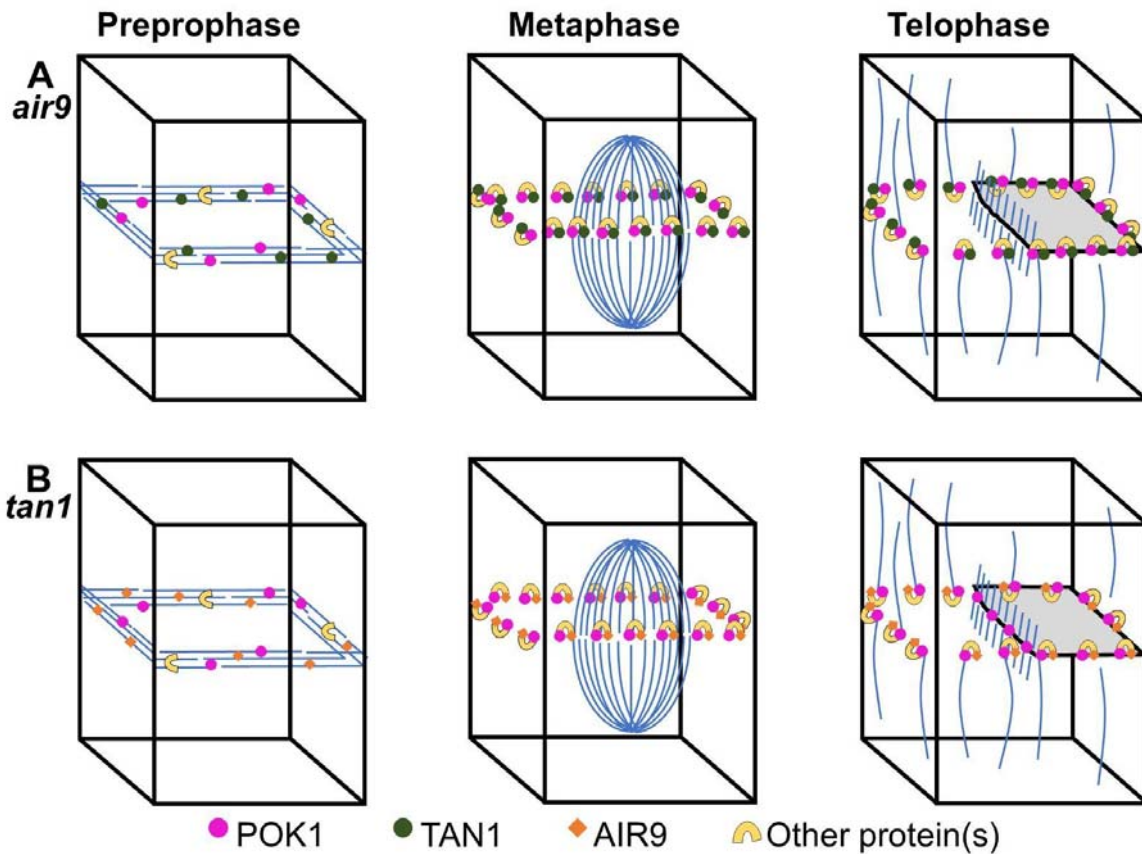

856  
857  
858  
859  
860  
861  
862  
863  
864

**Supplementary Figure 6. A model of POK1 localization in *tan1* and *air9* single mutants.** A) In *air9* single mutants TAN1 and POK1 are recruited to the PPB and their interaction with one another and other proteins stabilizes TAN1 and POK1 at the division site. B) In *tan1* single mutants AIR9 and POK1 are recruited to the PPB. POK1 is potentially stabilized at the division site either by interacting directly with AIR9 or another protein recruited to the division site by AIR9. POK1 tends to accumulate in the phragmoplast midline in *tan1* single mutants, which may reflect that POK1 is not as efficiently recruited to the division site in the absence of TAN1.

865  
 866  
 867 *A. thaliana* MVARTPQQRKQVAM-----VVPPLNSDLLKET **LNKVDK**CMERLQELQYTIAGGTKVVSGV  
 868 *O. sativa* MVARSPDARRSRQTAAAAAALNPALVRET **LKKVDR**CMARLQELQYTVAGGAKVVSGV  
 869 *Z. mays* MVARSPNAKPDRQKAAALAAAAALNPALLRET **LKKVDR**CMARLQELQYTVAGGAKVVSGV  
 870 *S. bicolor* MVARSPNAKPDRQTAAALAAAAALNPALVRET **LKKVDR**CMARLQELQYTVAGGAKVVSGV  
 871 *S. lycopersicum* MVARTPPKLQNKKM-----VVPPLNPILLRET **LNKVDK**CMARLQELQYTVTGGHKVLSGV  
 872 *B. napus* MVARTPQMQRVAM-----VVPPLNTELLKET **LNKVDK**CMERLQELQYTIAGGTKVVSGV  
 873 \*\*\*\*:\* .....\* \*:.\*\*:.\*\*\*.\*\* \*\*\*\*\*:.\* \*\*:\*\*

874  
 875 **Supplementary Figure 7. Alignments of amino acids 1-55 of *A. thaliana* TAN1 with TAN1**  
 876 **homologs from other plant species.** Amino acids 28-33 of Arabidopsis TAN1 and amino acids that  
 877 align with them in other plant species are highlighted in green. "\*" indicates residues are fully  
 878 conserved, ":" indicates strong conservation of properties across species, and "." indicates weak  
 879 conservation of properties across species.

880  
 881

882 **Supplementary Table 1. Primers used for cloning and genotyping.**

883

| Primer Name        | Sequence                                         |
|--------------------|--------------------------------------------------|
| ATRP               | ATCTCTTAGGAACCAAAACCGGACGCTGT                    |
| ATLP               | GATCCGTTACGAAAGTGAACACCTTTATC                    |
| JL202              | CATTTTATAATAACGCTGCCGACATCTAC                    |
| AIR9-5RP           | TGGATCAGCTGCAACATTATTC                           |
| AIR9-5LP           | ATTAACATTTTGCAACGCAGG                            |
| LBb1.3             | ATTTTGCCGATTTCCGGAAC                             |
| Ds5-4              | TACGATAACGGTCGGTACGG                             |
| AtTAN 733-CDS Rw   | AAATAGAGGGTTCGGAAAAAGAACC                        |
| AIR9 gnm7511 R     | CCTCCAGTATATGAAGCAACAAAGC                        |
| AIR9_cDNA 2230 F   | GATGAGGAATATATGTTATCTTTAGATG                     |
| Ala_Scan_FOR       | GCCGTCACAGATAGATTGGCT                            |
| Ala_Scan_Rev       | GAAAGCAACCTGACCTACAGG                            |
| Ala_02_FOR         | GCTGCTGCCGCTGCCGCTGTGCCTCCTCAACTCAGAT            |
| Ala_02_Rev         | AGCGGCAGCGGCAGCAGCCTGCTTCTGTGGGTTCT              |
| Ala_03_FOR         | GCTGCTGCCGCTGCCGCTGATCTTCTCAAGGAAACGATCAAC       |
| Ala_03_REV         | AGCGGCAGCGGCAGCAGCCACCATCGCCACTTTCCT             |
| Ala_04_FOR         | GCTGCTGCCGCTGCCGCTATCAACAAGGTTGATAAATGTATGGAA    |
| Ala_04_REV         | AGCGGCAGCGGCAGCAGCTGAGTTGAGAGGAGGCACCAC          |
| Ala_05_FOR         | GCTGCTGCCGCTGCCGCTGTATGGAAAGACTGCAAGAGCTA        |
| Ala_05_REV         | AGCGGCAGCGGCAGCAGCCGTTTCTTGAGAAGATCTGAGTT        |
| Ala_06_FOR         | GCTGCTGCCGCTGCCGCTGAGCTACAGTACACAATTGCAGGA       |
| Ala_06_REV         | AGCGGCAGCGGCAGCAGCTTATCAACCTTGTGATCGTTTCTT       |
| Ala_07_FOR         | GCTGCTGCCGCTGCCGCTGCAGGAGGAACCAAAGTTGTC          |
| Ala_07_REV         | AGCGGCAGCGGCAGCAGCTTGCAGTCTTCCATACATTTATCAAC     |
| Ala_08_FOR         | GCTGCTGCCGCTGCCGCTGTCTCTGGTGTGAACCTTAGC          |
| Ala_08_REV         | AGCGGCAGCGGCAGCAGCAATTGTGTAAGTGTAGCTCTTGCAG      |
| Ala_09_FOR         | GCTGCTGCCGCTGCCGCTAGCCCTCGAAGCACTAGA             |
| Ala_09_REV         | AGCGGCAGCGGCAGCAGCAACTTTGGTTCTCCTGCAAT           |
| Ala_10_FOR         | GCTGCTGCCGCTGCCGCTATTTACTTGAAGACTAGTCTTAGATGCAAG |
| Ala_10_REV         | AGCGGCAGCGGCAGCAGCAAGGTTACACCAGAGACAAC           |
| Ala_12_FOR         | GCTGCTGCCGCTGCCGCTACTTTAAGGATCAAGAATGCTACTAATAAG |
| Ala_12_REV         | AGCGGCAGCGGCAGCAGCACTAGTCTTCAAGTAAATTTCTAGTGCT   |
| Ala_13_FOR         | GCTGCTGCCGCTGCCGCTGCTACTAATAAGAAATCTCCAGTAGGG    |
| Ala_13_REV         | AGCGGCAGCGGCAGCAGCTTCTTGGCTTGCATCTAAGACTAGT      |
| Ala_14_FOR         | GCTGCTGCCGCTGCCGCTCCAGTAGGGAAGTTTCTGCT           |
| Ala_14_REV         | AGCGGCAGCGGCAGCAGCATTCTTGTATCCTTAAAGTTTCTTGCTT   |
| Ala_15_FOR         | GCTGCTGCCGCTGCCGCTGCTTCTCACCAGGAGATTGG           |
| Ala_15_REV         | AGCGGCAGCGGCAGCAGCAGATTCTTATTAGTAGCATTCTTGATCCT  |
| Ala_16_FOR         | GCTGCTGCCGCTGCCGCTTGGAGGAAAATGCACTCCCA           |
| Ala_16_REV         | AGCGGCAGCGGCAGCAGCAGGAAACTTCCCTACTGGAGA          |
| Ala_17_FOR         | GCTGCTGCCGCTGCCGCTCCAGCAATGCTACTAGGAGAG          |
| Ala_17_REV         | AGCGGCAGCGGCAGCAGCATCTCCTGGTGAGGAAGCAGG          |
| Ala_19_FOR         | GCTGCTGCCGCTGCCGCTTACAAGCCTCACAGGTCACA           |
| Ala_19_REV         | AGCGGCAGCGGCAGCAGCTCCTAGTAGCATTGCTGGGAG          |
| Ala_20_FOR         | GCTGCTGCCGCTGCCGCTACAAGAGACATTGTGGACGCC          |
| Ala_20_REV         | AGCGGCAGCGGCAGCAGCGATTTCATTTACAGTCTCTCCTAGTAGCAT |
| NpTANSaclFor       | gtatgagctccggtagagttgaaccg                       |
| NpTANceruleanRev   | cctcgcccttgctcaccatcttctatatatattttctta          |
| NpTANceruleanFor   | taaagaaaatatatagaagatgggtgagcaagggcgagg          |
| CeruleanpEarleyRev | ggccccgggtaccgtcctgttacagctcgtccatgc             |
| CeruleanpEarleyFor | gcatggcagcagctgtacaagcaggtaccgcccc               |
| pEarleyOCSpstlRev  | ccatctgcagctgctgagcctcgacat                      |
| AtExon1_1For       | ctcaactcagatcttctcaaggaacg                       |
| At255AfterStopRev  | gcatagtggtaccctcaattacacc                        |

884

885

886

887

888

## Parsed Citations

**Bellinger, M.A., Ueyehara, A.N., Martinez, P., McCarthy, M.C., and Rasmussen, C.G. (2021). Cell cortex microtubules contribute to division plane positioning during telophase in maize. Cold Spring Harbor Laboratory: 2021.01.11.426230.**

Google Scholar: [Author Only](#) [Title Only](#) [Author and Title](#)

**Buschmann, H., Chan, J., Sanchez-Pulido, L., Andrade-Navarro, M.A., Doonan, J.H., and Lloyd, C.W. (2006). Microtubule-associated AIR9 recognizes the cortical division site at preprophase and cell-plate insertion. Curr. Biol. 16: 1938–1943.**

Google Scholar: [Author Only](#) [Title Only](#) [Author and Title](#)

**Buschmann, H., Dols, J., Kopischke, S., Peña, E.J., Andrade-Navarro, M.A., Heinlein, M., Szymanski, D.B., Zachgo, S., Doonan, J.H., and Lloyd, C.W. (2015). Arabidopsis KCBP interacts with AIR9 but stays in the cortical division zone throughout mitosis via its MyTH4-FERM domain. J. Cell Sci. 128: 2033–2046.**

Google Scholar: [Author Only](#) [Title Only](#) [Author and Title](#)

**Chugh, M., Reißner, M., Bugiel, M., Lipka, E., Herrmann, A., Roy, B., Müller, S., and Schäffer, E. (2018). Phragmoplast Orienting Kinesin 2 Is a Weak Motor Switching between Processive and Diffusive Modes. Biophys. J. 115: 375–385.**

Google Scholar: [Author Only](#) [Title Only](#) [Author and Title](#)

**Cleary, A.L. and Smith, L.G. (1998). The Tangled1 gene is required for spatial control of cytoskeletal arrays associated with cell division during maize leaf development. Plant Cell 10: 1875–1888.**

Google Scholar: [Author Only](#) [Title Only](#) [Author and Title](#)

**Clough, S.J. and Bent, A.F. (1999). Floral dip : a simplified method for Agrobacterium-mediated transformation of Arabidopsis thaliana. 16: 735–743.**

Google Scholar: [Author Only](#) [Title Only](#) [Author and Title](#)

**Dixit, R. and Cyr, R.J. (2002). Spatio-temporal relationship between nuclear-envelope breakdown and preprophase band disappearance in cultured tobacco cells. Protoplasma 219: 116–121.**

Google Scholar: [Author Only](#) [Title Only](#) [Author and Title](#)

**Earley, K.W., Haag, J.R., Pontes, O., Opper, K., Juehne, T., Song, K., and Pikaard, C.S. (2006). Gateway-compatible vectors for plant functional genomics and proteomics. Plant J. 45: 616–629.**

Google Scholar: [Author Only](#) [Title Only](#) [Author and Title](#)

**Facette, M.R., Rasmussen, C.G., and Van Norman, J.M. (2018). A plane choice: coordinating timing and orientation of cell division during plant development. Curr. Opin. Plant Biol. 47: 47–55.**

Google Scholar: [Author Only](#) [Title Only](#) [Author and Title](#)

**Fan, H.Y., Hu, Y., Tudor, M., and Ma, H. (1997). Specific interactions between the K domains of AG and AGLs, members of the MADS domain family of DNA binding proteins. Plant J. 12: 999–1010.**

Google Scholar: [Author Only](#) [Title Only](#) [Author and Title](#)

**Fisher, C.L. and Pei, G.K. (1997). Modification of a PCR-based site-directed mutagenesis method. Biotechniques 23: 570–1, 574.**

Google Scholar: [Author Only](#) [Title Only](#) [Author and Title](#)

**Herrmann, A., Livanos, P., Lipka, E., Gadeyne, A., Hauser, M.-T., Van Damme, D., and Müller, S. (2018). Dual localized kinesin-12 POK2 plays multiple roles during cell division and interacts with MAP65-3. EMBO Rep. 19: e46085.**

Google Scholar: [Author Only](#) [Title Only](#) [Author and Title](#)

**Hoshino, H., Yoneda, A., Kumagai, F., and Hasezawa, S. (2003). Roles of actin-depleted zone and preprophase band in determining the division site of higher-plant cells, a tobacco BY-2 cell line expressing GFP-tubulin. Protoplasma 222: 157–165.**

Google Scholar: [Author Only](#) [Title Only](#) [Author and Title](#)

**Hwang, J.-U., Vernoud, V., Szumlanski, A., Nielsen, E., and Yang, Z. (2008). A tip-localized RhoGAP controls cell polarity by globally inhibiting Rho GTPase at the cell apex. Curr. Biol. 18: 1907–1916.**

Google Scholar: [Author Only](#) [Title Only](#) [Author and Title](#)

**Karahara, I., Suda, J., Tahara, H., Yokota, E., Shimmen, T., Misaki, K., Yonemura, S., Staehelin, L.A., and Mineyuki, Y. (2009). The preprophase band is a localized center of clathrin-mediated endocytosis in late prophase cells of the onion cotyledon epidermis. Plant J. 57: 819–831.**

Google Scholar: [Author Only](#) [Title Only](#) [Author and Title](#)

**Kirik, V., Herrmann, U., Parupalli, C., Sedbrook, J.C., Ehrhardt, D.W., and Hülskamp, M. (2007). CLASP localizes in two discrete patterns on cortical microtubules and is required for cell morphogenesis and cell division in Arabidopsis.: 4416–4425.**

Google Scholar: [Author Only](#) [Title Only](#) [Author and Title](#)

**Kojo, K.H., Higaki, T., Kutsuna, N., Yoshida, Y., Yasuhara, H., and Hasezawa, S. (2013). Roles of cortical actin microfilament patterning in division plane orientation in plants. Plant Cell Physiol. 54: 1491–1503.**

Google Scholar: [Author Only](#) [Title Only](#) [Author and Title](#)

**Kumari, P., Dahiya, P., Livanos, P., Zergiebel, L., Kölling, M., Poeschl, Y., Stamm, G., Hermann, A., Abel, S., Müller, S., and Bürstenbinder, K. (2021). IQ67 DOMAIN proteins facilitate preprophase band formation and division-plane orientation. *Nat Plants* 7: 739–747.**

Google Scholar: [Author Only](#) [Title Only](#) [Author and Title](#)

**Lee, Y.-R.J., Hiwatashi, Y., Hotta, T., Xie, T., Doonan, J.H., and Liu, B. (2017). The Mitotic Function of Augmin Is Dependent on Its Microtubule-Associated Protein Subunit EDE1 in *Arabidopsis thaliana*. *Curr. Biol.* 27: 3891–3897.e4.**

Google Scholar: [Author Only](#) [Title Only](#) [Author and Title](#)

**Lee, Y.-R.J. and Liu, B. (2019). Microtubule nucleation for the assembly of acentrosomal microtubule arrays in plant cells. *New Phytol.* 222: 1705–1718.**

Google Scholar: [Author Only](#) [Title Only](#) [Author and Title](#)

**Lee, Y.-R.J., Li, Y., and Liu, B. (2007). Two *Arabidopsis* phragmoplast-associated kinesins play a critical role in cytokinesis during male gametogenesis. *Plant Cell* 19: 2595–2605.**

Google Scholar: [Author Only](#) [Title Only](#) [Author and Title](#)

**Lipka, E., Gadeyne, A., Stöckle, D., Zimmermann, S., De Jaeger, G., Ehrhardt, D.W., Kirik, V., Van Damme, D., and Müller, S. (2014). The Phragmoplast-Orienting Kinesin-12 Class Proteins Translate the Positional Information of the Preprophase Band to Establish the Cortical Division Zone in *Arabidopsis thaliana*. *Plant Cell* 26: 2617–2632.**

Google Scholar: [Author Only](#) [Title Only](#) [Author and Title](#)

**Li, S., Sun, T., and Ren, H. (2015). The functions of the cytoskeleton and associated proteins during mitosis and cytokinesis in plant cells. *Front. Plant Sci.* 6: 282.**

Google Scholar: [Author Only](#) [Title Only](#) [Author and Title](#)

**Livanos, P. and Müller, S. (2019). Division Plane Establishment and Cytokinesis. *Annu. Rev. Plant Biol.***

Google Scholar: [Author Only](#) [Title Only](#) [Author and Title](#)

**Martinez, P., Dixit, R., Balkunde, R.S., Zhang, A., O'Leary, S.E., Brakke, K.A., and Rasmussen, C.G. (2020). TANGLED1 mediates microtubule interactions that may promote division plane positioning in maize. *J. Cell Biol.* 219.**

Google Scholar: [Author Only](#) [Title Only](#) [Author and Title](#)

**Martinez, P., Luo, A., Sylvester, A., and Rasmussen, C.G. (2017). Proper division plane orientation and mitotic progression together allow normal growth of maize. *Proc. Natl. Acad. Sci. U. S. A.* 114: 2759–2764.**

Google Scholar: [Author Only](#) [Title Only](#) [Author and Title](#)

**McMichael, C.M. and Bednarek, S.Y. (2013). Cytoskeletal and membrane dynamics during higher plant cytokinesis. *New Phytol.* 197: 1039–1057.**

Google Scholar: [Author Only](#) [Title Only](#) [Author and Title](#)

**Miki, T., Naito, H., Nishina, M., and Goshima, G. (2014). Endogenous localizome identifies 43 mitotic kinesins in a plant cell. *Proc. Natl. Acad. Sci. U. S. A.* 111: E1053–E1061.**

Google Scholar: [Author Only](#) [Title Only](#) [Author and Title](#)

**Mills, A.M. and Rasmussen, C. (2022). Action at a distance: Defects in division plane positioning in the root meristematic zone affect cell organization in the differentiation zone. *bioRxiv*: 2021.04.30.442137.**

Google Scholar: [Author Only](#) [Title Only](#) [Author and Title](#)

**Mir, R., Morris, V.H., Buschmann, H., and Rasmussen, C.G. (2018). Division Plane Orientation Defects Revealed by a Synthetic Double Mutant Phenotype. *Plant Physiol.* 176: 418–431.**

Google Scholar: [Author Only](#) [Title Only](#) [Author and Title](#)

**Müller, S., Han, S., and Smith, L.G. (2006). Two kinesins are involved in the spatial control of cytokinesis in *Arabidopsis thaliana*. *Curr. Biol.* 16: 888–894.**

Google Scholar: [Author Only](#) [Title Only](#) [Author and Title](#)

**Müller, S. and Jürgens, G. (2016). Plant cytokinesis-No ring, no constriction but centrifugal construction of the partitioning membrane. *Semin. Cell Dev. Biol.* 53: 10–18.**

Google Scholar: [Author Only](#) [Title Only](#) [Author and Title](#)

**Murata, T., Sano, T., Sasabe, M., Nonaka, S., Higashiyama, T., Hasezawa, S., Machida, Y., and Hasebe, M. (2013). Mechanism of microtubule array expansion in the cytokinetic phragmoplast. *Nat. Commun.* 4: 1967.**

Google Scholar: [Author Only](#) [Title Only](#) [Author and Title](#)

**Nakaoka, Y., Miki, T., Fujioka, R., Uehara, R., Tomioka, A., Obuse, C., Kubo, M., Hiwatashi, Y., and Goshima, G. (2012). An inducible RNA interference system in *Physcomitrella patens* reveals a dominant role of augmin in phragmoplast microtubule generation. *Plant Cell* 24: 1478–1493.**

Google Scholar: [Author Only](#) [Title Only](#) [Author and Title](#)

van Oostende-Triplet, C., Guillet, D., Triplet, T., Pandzic, E., Wiseman, P.W., and Geitmann, A. (2017). Vesicle Dynamics during Plant Cell Cytokinesis Reveals Distinct Developmental Phases. *Plant Physiol.* 174: 1544–1558.

Google Scholar: [Author Only](#) [Title Only](#) [Author and Title](#)

Pan, R., Lee, Y.-R.J., and Liu, B. (2004). Localization of two homologous Arabidopsis kinesin-related proteins in the phragmoplast. *Planta* 220: 156–164.

Google Scholar: [Author Only](#) [Title Only](#) [Author and Title](#)

Panteris, E. (2008). Cortical actin filaments at the division site of mitotic plant cells: a reconsideration of the "actin-depleted zone." *New Phytol.* 179: 334–341.

Google Scholar: [Author Only](#) [Title Only](#) [Author and Title](#)

Pan, X., Fang, L., Liu, J., Senay-Aras, B., Lin, W., Zheng, S., Zhang, T., Guo, J., Manor, U., Van Norman, J., Chen, W., and Yang, Z. (2020). Auxin-induced signaling protein nanoclustering contributes to cell polarity formation. *Nat. Commun.* 11: 3914.

Google Scholar: [Author Only](#) [Title Only](#) [Author and Title](#)

Rasmussen, C.G. and Bellinger, M. (2018). An overview of plant division-plane orientation. *New Phytol.*

Google Scholar: [Author Only](#) [Title Only](#) [Author and Title](#)

Rasmussen, C.G., Sun, B., and Smith, L.G. (2011). Tangled localization at the cortical division site of plant cells occurs by several mechanisms.: 270–279.

Google Scholar: [Author Only](#) [Title Only](#) [Author and Title](#)

Russell, D.W. and Sambrook, J. (2001). Molecular cloning: a laboratory manual Third. (Cold Spring Harbor Laboratory Cold Spring Harbor, NY: Cold Spring Harbor).

Google Scholar: [Author Only](#) [Title Only](#) [Author and Title](#)

Schaefer, E., Belcram, K., Uyttewaal, M., Duroc, Y., Goussot, M., Pastuglia, M., and Bouchez, D. (2017). The preprophase band of microtubules controls the robustness of division orientation in plants. 189: 186–189.

Google Scholar: [Author Only](#) [Title Only](#) [Author and Title](#)

Smertenko, A. et al. (2017). Plant Cytokinesis: Terminology for Structures and Processes. *Trends Cell Biol.* 27: 885–894.

Google Scholar: [Author Only](#) [Title Only](#) [Author and Title](#)

Smertenko, A., Hewitt, S.L., Jacques, C.N., Kacprzyk, R., Liu, Y., Marcec, M.J., Moyo, L., Ogden, A., Oung, H.M., Schmidt, S., and Serrano-Romero, E.A. (2018). Phragmoplast microtubule dynamics - a game of zones. *J. Cell Sci.* 131: jcs203331.

Google Scholar: [Author Only](#) [Title Only](#) [Author and Title](#)

Song, H., Golovkin, M., Reddy, A.S., and Endow, S.A. (1997). In vitro motility of AtKCBP, a calmodulin-binding kinesin protein of Arabidopsis. *Proc. Natl. Acad. Sci. U. S. A.* 94: 322–327.

Google Scholar: [Author Only](#) [Title Only](#) [Author and Title](#)

Stöckle, D., Herrmann, A., Lipka, E., Lauster, T., Gavidia, R., Zimmermann, S., and Müller, S. (2016). Putative RopGAPs impact division plane selection and interact with kinesin-12 POK1. *Nat Plants* 2: 16120.

Google Scholar: [Author Only](#) [Title Only](#) [Author and Title](#)

Suetsugu, N., Yamada, N., Kagawa, T., Yonekura, H., Uyeda, T.Q.P., Kadota, A., and Wada, M. (2010). Two kinesin-like proteins mediate actin-based chloroplast movement in Arabidopsis thaliana. *Proc. Natl. Acad. Sci. U. S. A.* 107: 8860–8865.

Google Scholar: [Author Only](#) [Title Only](#) [Author and Title](#)

Sugimoto, K., Williamson, R.E., and Wasteneys, G.O. (2000). New Techniques Enable Comparative Analysis of Microtubule Orientation, Wall Texture, and Growth Rate in Intact Roots of Arabidopsis. *Plant Physiology* 124: 1493–1506.

Google Scholar: [Author Only](#) [Title Only](#) [Author and Title](#)

Van Damme, D. (2009). Division plane determination during plant somatic cytokinesis. *Curr. Opin. Plant Biol.* 12: 745–751.

Google Scholar: [Author Only](#) [Title Only](#) [Author and Title](#)

Vanstraelen, M., Torres Acosta, J.A., De Veylder, L., Inzé, D., and Geelen, D. (2004). A plant-specific subclass of C-terminal kinesins contains a conserved a-type cyclin-dependent kinase site implicated in folding and dimerization. *Plant Physiol.* 135: 1417–1429.

Google Scholar: [Author Only](#) [Title Only](#) [Author and Title](#)

Walker, K.L., Müller, S., Moss, D., Ehrhardt, D.W., and Smith, L.G. (2007). Arabidopsis TANGLED identifies the division plane throughout mitosis and cytokinesis. *Curr. Biol.* 17: 1827–1836.

Google Scholar: [Author Only](#) [Title Only](#) [Author and Title](#)

Wu, S.-Z., Yamada, M., Mallett, D.R., and Bezanilla, M. (2018). Cytoskeletal discoveries in the plant lineage using the moss *Physcomitrella patens*. *Biophys. Rev.*

Google Scholar: [Author Only](#) [Title Only](#) [Author and Title](#)

Xu, X.M., Zhao, Q., Rodrigo-Peiris, T., Brkljacic, J., He, C.S., Müller, S., and Meier, I. (2008). RanGAP1 is a continuous marker of



bioRxiv preprint doi: <https://doi.org/10.1101/2022.04.27.489732>; this version posted April 28, 2022. The copyright holder for this preprint (which was not certified by peer review) is the author/funder, who has granted bioRxiv a license to display the preprint in perpetuity. It is made available under a [CC-BY-NC-ND 4.0 International license](#).

**the Arabidopsis cell division plane. Proc. Natl. Acad. Sci. U. S. A. 105: 18637–18642.**

Google Scholar: [Author Only](#) [Title Only](#) [Author and Title](#)
